# Supplementary material for: In vitro and in silico parameters for precise cgMLST typing of Listeria monocytogenes
Source: PubMed Central journal article supplement (PMC8961897; doi:10.1186/s12864-022-08437-4), 2022-03-26
Supplement: 12864_2022_8437_MOESM5_ESM.pdf [file 12864_2022_8437_MOESM5_ESM.pdf]

## A

| Parameters            | Coef. estimate | Coef. standard error | Coef. t value | Coef. P-value (> t ) |
|-----------------------|----------------|----------------------|---------------|----------------------|
| N100                  | -3.3E-04       | 1.8E-05              | -1.8E+01      | 2.0E-16              |
| IAAS                  | 5.8E-04        | 1.3E-04              | 4.6E+00       | 3.7E-06              |
| UAL                   | -6.5E-06       | 2.4E-06              | -2.7E+00      | 7.3E-03              |
| TL0                   | 6.1E-06        | 2.3E-06              | 2.7E+00       | 7.5E-03              |
| TAL                   | -3.3E-06       | 1.8E-06              | -1.8E+00      | 6.8E-02              |
| C0                    | -2.8E-04       | 2.6E-04              | -1.1E+00      | 2.8E-01              |
| UAC                   | 7.0E-04        | 6.6E-04              | 1.1E+00       | 2.9E-01              |
| UACP                  | 4.6E-03        | 4.4E-03              | 1.0E+00       | 3.0E-01              |
| WORKFLOW: GENPAT      | -2.7E-03       | 2.7E-03              | -9.8E-01      | 3.3E-01              |
| TL1000                | -1.2E-06       | 1.3E-06              | -9.5E-01      | 3.4E-01              |
| C1000                 | 1.1E-03        | 1.4E-03              | 7.9E-01       | 4.3E-01              |
| REFERENCE: ATCCBAA679 | 3.8E-02        | 5.2E-02              | 7.3E-01       | 4.6E-01              |
| REFERENCE: ATCC19115  | 3.1E-02        | 4.4E-02              | 7.2E-01       | 4.7E-01              |
| MAC                   | 6.8E-03        | 1.0E-02              | 6.5E-01       | 5.2E-01              |
| WORKFLOW: INNUENDO    | -2.0E-03       | 3.5E-03              | -5.9E-01      | 5.6E-01              |
| MA                    | -5.4E-03       | 9.2E-03              | -5.9E-01      | 5.6E-01              |
| GC                    | -7.7E-02       | 1.3E-01              | -5.9E-01      | 5.6E-01              |
| NG50                  | -5.4E-08       | 9.3E-08              | -5.8E-01      | 5.6E-01              |
| LG50                  | -6.9E-03       | 1.3E-02              | -5.4E-01      | 5.9E-01              |
| ID100                 | 3.2E-03        | 6.2E-03              | 5.1E-01       | 6.1E-01              |
| WORKFLOW: SeqSphere   | -3.4E-03       | 6.9E-03              | -4.9E-01      | 6.2E-01              |
| N50                   | 3.6E-08        | 7.8E-08              | 4.6E-01       | 6.4E-01              |
| L50                   | 5.6E-03        | 1.2E-02              | 4.5E-01       | 6.5E-01              |
| N75                   | -8.4E-08       | 1.9E-07              | -4.4E-01      | 6.6E-01              |
| NG75                  | 7.8E-08        | 1.9E-07              | 4.1E-01       | 6.8E-01              |
| TL50000               | -4.7E-08       | 1.3E-07              | -3.6E-01      | 7.2E-01              |
| LGA50                 | 3.9E-03        | 1.3E-02              | 3.0E-01       | 7.6E-01              |
| LA                    | 1.6E-08        | 5.6E-08              | 2.9E-01       | 7.7E-01              |
| BREADTH               | 4.3E-03        | 1.5E-02              | 2.9E-01       | 7.7E-01              |
| L75                   | -2.9E-03       | 1.0E-02              | -2.8E-01      | 7.8E-01              |
| LG75                  | 2.6E-03        | 9.5E-03              | 2.7E-01       | 7.9E-01              |
| LC                    | -1.4E-08       | 5.6E-08              | -2.6E-01      | 8.0E-01              |
| GF                    | -8.6E-03       | 3.3E-02              | -2.6E-01      | 8.0E-01              |
| C50000                | 1.2E-03        | 4.9E-03              | 2.5E-01       | 8.0E-01              |
| LA50                  | -3.2E-03       | 1.3E-02              | -2.5E-01      | 8.0E-01              |
| MM100                 | -2.4E-04       | 1.2E-03              | -2.0E-01      | 8.4E-01              |
| LGA75                 | -1.4E-03       | 7.6E-03              | -1.8E-01      | 8.5E-01              |
| NGA50                 | 2.1E-08        | 1.1E-07              | 1.8E-01       | 8.6E-01              |
| SEQUENCING: NextSeq_B | -2.1E-04       | 1.2E-03              | -1.7E-01      | 8.6E-01              |
| C5000                 | -9.3E-04       | 6.0E-03              | -1.6E-01      | 8.8E-01              |
| UAMC                  | -2.6E-03       | 1.7E-02              | -1.5E-01      | 8.8E-01              |
| LA75                  | 1.3E-03        | 8.6E-03              | 1.5E-01       | 8.8E-01              |
| MACL                  | -1.3E-09       | 9.5E-09              | -1.4E-01      | 8.9E-01              |
| NA75                  | 1.5E-08        | 1.1E-07              | 1.4E-01       | 8.9E-01              |
| DEPTH                 | -4.4E-06       | 3.5E-05              | -1.2E-01      | 9.0E-01              |

|                        |                |                |                |                |
|------------------------|----------------|----------------|----------------|----------------|
| NGA75                  | -1.1E-08       | 1.0E-07        | -1.1E-01       | 9.1E-01        |
| DR                     | -3.0E-01       | 3.1E+00        | -9.9E-02       | 9.2E-01        |
| C10000                 | -7.6E-04       | 7.8E-03        | -9.8E-02       | 9.2E-01        |
| DNA: extraction_A      | 1.4E-04        | 1.5E-03        | 9.8E-02        | 9.2E-01        |
| TL5000                 | 1.1E-07        | 1.2E-06        | 9.6E-02        | 9.2E-01        |
| C25000                 | -6.1E-04       | 8.0E-03        | -7.6E-02       | 9.4E-01        |
| NA50                   | -6.9E-09       | 1.0E-07        | -6.7E-02       | 9.5E-01        |
| PLATING: tenth_culture | 9.5E-05        | 2.0E-03        | 4.8E-02        | 9.6E-01        |
| TL10000                | -3.4E-08       | 9.8E-07        | -3.5E-02       | 9.7E-01        |
| PLATING: fifth_culture | 6.2E-05        | 1.9E-03        | 3.2E-02        | 9.7E-01        |
| LMA                    | -2.2E-05       | 7.3E-04        | -3.0E-02       | 9.8E-01        |
| SQLM                   | -1.8E-05       | 7.7E-04        | -2.4E-02       | 9.8E-01        |
| TL25000                | 6.2E-09        | 3.7E-07        | 1.7E-02        | 9.9E-01        |
| SQEM                   | -6.4E-05       | 3.8E-03        | -1.7E-02       | 9.9E-01        |
| WORKFLOW: BioNumerics  | -5.5E-05       | 3.7E-03        | -1.5E-02       | 9.9E-01        |
| DNA: extraction_B      | 1.2E-05        | 1.4E-03        | 8.2E-03        | 9.9E-01        |
| <b>Model intercept</b> | <b>5.3E+00</b> | <b>6.0E+00</b> | <b>8.9E-01</b> | <b>3.7E-01</b> |

## B

| Parameters             | Coef. estimate | Coef. standard error | Coef. t value | Coef. P-value (> t ) |
|------------------------|----------------|----------------------|---------------|----------------------|
| C25000                 | 4.0E-03        | 3.7E-02              | 1.1E-01       | 9.1E-01              |
| TL25000                | -2.1E-07       | 2.0E-06              | -1.1E-01      | 9.1E-01              |
| C10000                 | -3.3E-03       | 3.6E-02              | -9.1E-02      | 9.3E-01              |
| REFERENCE: ATCC19115   | 1.2E-02        | 1.4E-01              | 9.0E-02       | 9.3E-01              |
| LMA                    | -1.4E-04       | 1.7E-03              | -8.7E-02      | 9.3E-01              |
| LGA75                  | -1.6E-03       | 1.9E-02              | -8.3E-02      | 9.3E-01              |
| REFERENCE: ATCCBAA679  | 1.3E-02        | 1.6E-01              | 7.8E-02       | 9.4E-01              |
| MA                     | -1.2E-03       | 1.6E-02              | -7.7E-02      | 9.4E-01              |
| DR                     | -7.3E-01       | 1.2E+01              | -6.0E-02      | 9.5E-01              |
| GF                     | -7.3E-03       | 1.2E-01              | -5.9E-02      | 9.5E-01              |
| ID100                  | -7.3E-04       | 1.6E-02              | -4.7E-02      | 9.6E-01              |
| LA75                   | 1.5E-03        | 3.2E-02              | 4.5E-02       | 9.6E-01              |
| TL10000                | 1.5E-07        | 3.4E-06              | 4.5E-02       | 9.6E-01              |
| LG75                   | 1.1E-03        | 2.4E-02              | 4.5E-02       | 9.6E-01              |
| C1000                  | -2.2E-04       | 5.8E-03              | -3.9E-02      | 9.7E-01              |
| MACL                   | 8.3E-10        | 2.2E-08              | 3.8E-02       | 9.7E-01              |
| C50000                 | -5.3E-04       | 1.6E-02              | -3.4E-02      | 9.7E-01              |
| PLATING: tenth_culture | 1.0E-04        | 4.5E-03              | 2.2E-02       | 9.8E-01              |
| GC                     | 7.8E-03        | 3.6E-01              | 2.2E-02       | 9.8E-01              |
| L75                    | -7.3E-04       | 3.4E-02              | -2.2E-02      | 9.8E-01              |
| TL50000                | 8.8E-09        | 4.1E-07              | 2.2E-02       | 9.8E-01              |
| C0                     | 8.4E-05        | 4.1E-03              | 2.0E-02       | 9.8E-01              |
| MM100                  | 5.3E-05        | 2.6E-03              | 2.0E-02       | 9.8E-01              |
| NA50                   | 7.7E-09        | 4.0E-07              | 1.9E-02       | 9.8E-01              |
| UAL                    | -2.3E-07       | 1.3E-05              | -1.8E-02      | 9.9E-01              |
| NA75                   | 8.3E-09        | 4.7E-07              | 1.8E-02       | 9.9E-01              |
| N100                   | -1.0E-05       | 6.0E-04              | -1.7E-02      | 9.9E-01              |
| C5000                  | -2.9E-04       | 1.7E-02              | -1.7E-02      | 9.9E-01              |

|                        |                |                |                |                |
|------------------------|----------------|----------------|----------------|----------------|
| NGA75                  | -6.8E-09       | 4.2E-07        | -1.6E-02       | 9.9E-01        |
| L50                    | -8.7E-04       | 5.5E-02        | -1.6E-02       | 9.9E-01        |
| DNA: extraction_A      | -5.2E-05       | 3.4E-03        | -1.5E-02       | 9.9E-01        |
| N50                    | -9.6E-09       | 6.3E-07        | -1.5E-02       | 9.9E-01        |
| DEPTH                  | 1.2E-06        | 8.1E-05        | 1.5E-02        | 9.9E-01        |
| NGA50                  | -5.2E-09       | 3.7E-07        | -1.4E-02       | 9.9E-01        |
| TL0                    | 1.5E-07        | 1.1E-05        | 1.4E-02        | 9.9E-01        |
| LA50                   | 4.8E-04        | 3.7E-02        | 1.3E-02        | 9.9E-01        |
| MAC                    | 3.0E-04        | 2.3E-02        | 1.3E-02        | 9.9E-01        |
| LG50                   | 6.7E-04        | 5.1E-02        | 1.3E-02        | 9.9E-01        |
| LC                     | 1.5E-09        | 1.3E-07        | 1.2E-02        | 9.9E-01        |
| SQEM                   | -7.2E-05       | 6.2E-03        | -1.2E-02       | 9.9E-01        |
| TL1000                 | 9.2E-08        | 8.0E-06        | 1.1E-02        | 9.9E-01        |
| TAL                    | 3.9E-08        | 3.8E-06        | 1.0E-02        | 9.9E-01        |
| UAC                    | 1.2E-04        | 1.2E-02        | 9.7E-03        | 9.9E-01        |
| NG50                   | 5.9E-09        | 6.1E-07        | 9.5E-03        | 9.9E-01        |
| UACP                   | 1.6E-04        | 2.0E-02        | 7.7E-03        | 9.9E-01        |
| SEQUENCING: NextSeq_B  | -2.1E-05       | 2.8E-03        | -7.6E-03       | 9.9E-01        |
| SQLM                   | 1.4E-05        | 2.3E-03        | 6.2E-03        | 1.0E+00        |
| LGA50                  | -1.9E-04       | 3.1E-02        | -6.1E-03       | 1.0E+00        |
| BREADTH                | 2.1E-04        | 3.5E-02        | 5.9E-03        | 1.0E+00        |
| DNA; extraction_B      | -1.2E-05       | 3.3E-03        | -3.7E-03       | 1.0E+00        |
| NG75                   | 1.4E-09        | 3.8E-07        | 3.6E-03        | 1.0E+00        |
| LA                     | -3.6E-10       | 1.2E-07        | -2.9E-03       | 1.0E+00        |
| TL5000                 | 8.3E-09        | 3.4E-06        | 2.4E-03        | 1.0E+00        |
| N75                    | -5.7E-10       | 3.6E-07        | -1.6E-03       | 1.0E+00        |
| PLATING: fifth_culture | 6.4E-06        | 4.4E-03        | 1.4E-03        | 1.0E+00        |
| <b>Model intercept</b> | <b>7.9E+00</b> | <b>1.8E+01</b> | <b>4.5E-01</b> | <b>6.5E-01</b> |

### C

| Parameters             | Coef. estimate | Coef. standard error | Coef. t value | Coef. P-value (> t ) |
|------------------------|----------------|----------------------|---------------|----------------------|
| MM100                  | -1.2E-04       | 5.6E-03              | -2.1E-02      | 9.8E-01              |
| ID100                  | 3.5E-04        | 1.8E-02              | 1.9E-02       | 9.8E-01              |
| PLATING: tenth_culture | 9.1E-05        | 5.2E-03              | 1.7E-02       | 9.9E-01              |
| PLATING: fifth_culture | 5.5E-05        | 5.1E-03              | 1.1E-02       | 9.9E-01              |
| C0                     | -2.8E-05       | 2.7E-03              | -1.0E-02      | 9.9E-01              |
| TL1000                 | -5.9E-08       | 5.9E-06              | -9.9E-03      | 9.9E-01              |
| DNA: extraction_B      | -3.6E-05       | 3.9E-03              | -9.4E-03      | 9.9E-01              |
| C1000                  | 3.0E-05        | 4.6E-03              | 6.7E-03       | 9.9E-01              |
| LMA                    | 1.9E-05        | 3.4E-03              | 5.7E-03       | 1.0E+00              |
| C50000                 | -1.2E-04       | 2.1E-02              | -5.6E-03      | 1.0E+00              |
| GC                     | 2.0E-03        | 3.7E-01              | 5.5E-03       | 1.0E+00              |
| DEPTH                  | -5.1E-07       | 9.5E-05              | -5.4E-03      | 1.0E+00              |
| TL50000                | 2.5E-09        | 5.9E-07              | 4.2E-03       | 1.0E+00              |
| REFERENCE: ATCC19115   | 1.7E-03        | 4.1E-01              | 4.1E-03       | 1.0E+00              |
| SEQUENCING: NextSeq_B  | 1.2E-05        | 3.3E-03              | 3.7E-03       | 1.0E+00              |
| C25000                 | 1.3E-04        | 3.7E-02              | 3.7E-03       | 1.0E+00              |
| REFERENCE: ATCCBAA679  | 1.7E-03        | 5.0E-01              | 3.4E-03       | 1.0E+00              |

|                        |                |                |                |                |
|------------------------|----------------|----------------|----------------|----------------|
| L50                    | -4.8E-01       | 1.4E+02        | -3.3E-03       | 1.0E+00        |
| LA50                   | 4.8E-01        | 1.4E+02        | 3.3E-03        | 1.0E+00        |
| L75                    | 2.2E-01        | 6.6E+01        | 3.3E-03        | 1.0E+00        |
| LA75                   | -2.2E-01       | 6.6E+01        | -3.3E-03       | 1.0E+00        |
| MACL                   | -4.7E-07       | 1.4E-04        | -3.3E-03       | 1.0E+00        |
| MA                     | 1.9E-04        | 7.0E-02        | 2.7E-03        | 1.0E+00        |
| UAC                    | 5.8E-05        | 2.3E-02        | 2.5E-03        | 1.0E+00        |
| C5000                  | 3.8E-05        | 1.6E-02        | 2.3E-03        | 1.0E+00        |
| TAL                    | 9.9E-08        | 4.7E-05        | 2.1E-03        | 1.0E+00        |
| LG75                   | -6.6E-05       | 3.2E-02        | -2.0E-03       | 1.0E+00        |
| LA                     | 1.9E-07        | 9.2E-05        | 2.0E-03        | 1.0E+00        |
| LC                     | -1.9E-07       | 9.2E-05        | -2.0E-03       | 1.0E+00        |
| DNA: extraction_A      | 6.8E-06        | 4.0E-03        | 1.7E-03        | 1.0E+00        |
| GF                     | 7.2E-04        | 4.3E-01        | 1.7E-03        | 1.0E+00        |
| TL10000                | 5.3E-09        | 3.3E-06        | 1.6E-03        | 1.0E+00        |
| C10000                 | -4.9E-05       | 3.5E-02        | -1.4E-03       | 1.0E+00        |
| BREADTH                | -4.0E-05       | 3.6E-02        | -1.1E-03       | 1.0E+00        |
| TL0                    | -4.3E-08       | 4.5E-05        | -9.5E-04       | 1.0E+00        |
| TL5000                 | 2.3E-09        | 3.4E-06        | 6.7E-04        | 1.0E+00        |
| LG50                   | -2.9E-05       | 4.9E-02        | -5.9E-04       | 1.0E+00        |
| TL25000                | -1.2E-09       | 2.1E-06        | -5.4E-04       | 1.0E+00        |
| UAL                    | -1.2E-08       | 5.0E-05        | -2.3E-04       | 1.0E+00        |
| N75                    | 1.1E-06        | 6.6E-03        | 1.7E-04        | 1.0E+00        |
| NA75                   | -1.1E-06       | 6.6E-03        | -1.7E-04       | 1.0E+00        |
| NA50                   | 1.8E-07        | 1.6E-03        | 1.1E-04        | 1.0E+00        |
| NGA75                  | -7.2E-07       | 6.6E-03        | -1.1E-04       | 1.0E+00        |
| NG75                   | 7.2E-07        | 6.6E-03        | 1.1E-04        | 1.0E+00        |
| N50                    | -1.8E-07       | 1.6E-03        | -1.1E-04       | 1.0E+00        |
| NGA50                  | -1.7E-07       | 1.6E-03        | -1.0E-04       | 1.0E+00        |
| NG50                   | 1.7E-07        | 1.6E-03        | 1.0E-04        | 1.0E+00        |
| <b>Model intercept</b> | <b>7.3E+00</b> | <b>1.4E+01</b> | <b>5.2E-01</b> | <b>6.0E-01</b> |

## D

| Parameters             | Coef. estimate | Coef. standard error | Coef. t value | Coef. P-value (> t ) |
|------------------------|----------------|----------------------|---------------|----------------------|
| LGA50                  | 3.0E-03        | 4.1E-02              | 7.2E-02       | 9.4E-01              |
| NGA50                  | 3.8E-08        | 7.7E-07              | 4.9E-02       | 9.6E-01              |
| REFERENCE: ATCC19115   | 9.8E-03        | 2.2E-01              | 4.5E-02       | 9.6E-01              |
| REFERENCE: ATCCBAA679  | 1.2E-02        | 2.7E-01              | 4.4E-02       | 9.7E-01              |
| NA50                   | -3.4E-08       | 8.0E-07              | -4.3E-02      | 9.7E-01              |
| C1000                  | -2.1E-04       | 5.0E-03              | -4.2E-02      | 9.7E-01              |
| LA                     | 1.9E-08        | 5.0E-07              | 3.7E-02       | 9.7E-01              |
| LC                     | -1.8E-08       | 5.0E-07              | -3.7E-02      | 9.7E-01              |
| MAC                    | -1.0E-03       | 3.3E-02              | -3.1E-02      | 9.8E-01              |
| TL50000                | -1.6E-08       | 5.4E-07              | -3.0E-02      | 9.8E-01              |
| ID100                  | -4.8E-04       | 1.6E-02              | -2.9E-02      | 9.8E-01              |
| PLATING: tenth_culture | 1.3E-04        | 4.8E-03              | 2.8E-02       | 9.8E-01              |
| TL0                    | 3.1E-07        | 1.1E-05              | 2.7E-02       | 9.8E-01              |
| DNA: extraction_B      | -9.0E-05       | 3.4E-03              | -2.7E-02      | 9.8E-01              |

|                        |                |                |                |                |
|------------------------|----------------|----------------|----------------|----------------|
| LG50                   | -2.6E-03       | 9.6E-02        | -2.7E-02       | 9.8E-01        |
| NG50                   | -4.1E-08       | 1.6E-06        | -2.6E-02       | 9.8E-01        |
| GF                     | -5.5E-03       | 2.2E-01        | -2.5E-02       | 9.8E-01        |
| MM100                  | -7.3E-05       | 3.1E-03        | -2.4E-02       | 9.8E-01        |
| N50                    | 3.5E-08        | 1.6E-06        | 2.2E-02        | 9.8E-01        |
| TL1000                 | 9.0E-08        | 4.6E-06        | 2.0E-02        | 9.8E-01        |
| UAC                    | -8.5E-05       | 4.9E-03        | -1.7E-02       | 9.9E-01        |
| MA                     | 5.1E-04        | 3.0E-02        | 1.7E-02        | 9.9E-01        |
| C10000                 | -4.9E-04       | 3.1E-02        | -1.6E-02       | 9.9E-01        |
| NG75                   | -1.1E-07       | 6.8E-06        | -1.6E-02       | 9.9E-01        |
| LA75                   | 1.6E-03        | 1.0E-01        | 1.6E-02        | 9.9E-01        |
| N75                    | 9.4E-08        | 6.8E-06        | 1.4E-02        | 9.9E-01        |
| UAL                    | -1.8E-07       | 1.3E-05        | -1.3E-02       | 9.9E-01        |
| TL10000                | -4.8E-08       | 4.0E-06        | -1.2E-02       | 9.9E-01        |
| BREADTH                | 3.9E-04        | 3.5E-02        | 1.1E-02        | 9.9E-01        |
| TL25000                | -1.6E-08       | 1.5E-06        | -1.1E-02       | 9.9E-01        |
| N100                   | -9.3E-06       | 8.8E-04        | -1.0E-02       | 9.9E-01        |
| DR                     | 2.9E-01        | 2.8E+01        | 1.0E-02        | 9.9E-01        |
| NGA75                  | 6.9E-08        | 6.7E-06        | 1.0E-02        | 9.9E-01        |
| SQLM                   | -3.4E-05       | 3.4E-03        | -9.9E-03       | 9.9E-01        |
| C50000                 | 2.0E-04        | 2.1E-02        | 9.8E-03        | 9.9E-01        |
| PLATING: fifth_culture | 4.4E-05        | 4.6E-03        | 9.6E-03        | 9.9E-01        |
| LA50                   | -5.2E-04       | 5.9E-02        | -8.8E-03       | 9.9E-01        |
| NA75                   | -5.8E-08       | 6.7E-06        | -8.7E-03       | 9.9E-01        |
| LMA                    | -1.7E-05       | 2.1E-03        | -8.3E-03       | 9.9E-01        |
| DEPTH                  | -6.3E-07       | 8.2E-05        | -7.7E-03       | 9.9E-01        |
| LGA75                  | -5.5E-04       | 7.2E-02        | -7.6E-03       | 9.9E-01        |
| C0                     | 1.3E-05        | 1.8E-03        | 7.3E-03        | 9.9E-01        |
| SEQUENCING: NextSeq_B  | -2.2E-05       | 3.1E-03        | -7.1E-03       | 9.9E-01        |
| L75                    | -6.9E-04       | 1.1E-01        | -6.6E-03       | 9.9E-01        |
| DNA: extraction_A      | -1.6E-05       | 3.5E-03        | -4.5E-03       | 1.0E+00        |
| LG75                   | -3.3E-04       | 8.0E-02        | -4.1E-03       | 1.0E+00        |
| C25000                 | -1.1E-04       | 3.1E-02        | -3.7E-03       | 1.0E+00        |
| TL5000                 | 1.7E-08        | 4.8E-06        | 3.4E-03        | 1.0E+00        |
| TAL                    | -2.3E-08       | 7.3E-06        | -3.2E-03       | 1.0E+00        |
| L50                    | 3.1E-04        | 1.2E-01        | 2.7E-03        | 1.0E+00        |
| C5000                  | -6.4E-05       | 2.5E-02        | -2.5E-03       | 1.0E+00        |
| SQEM                   | 3.1E-05        | 1.3E-02        | 2.3E-03        | 1.0E+00        |
| GC                     | -4.2E-04       | 3.5E-01        | -1.2E-03       | 1.0E+00        |
| UACP                   | -1.0E-05       | 1.9E-02        | -5.5E-04       | 1.0E+00        |
| MACL                   | -4.6E-12       | 4.2E-08        | -1.1E-04       | 1.0E+00        |
| <b>Model intercept</b> | <b>6.8E+00</b> | <b>3.0E+01</b> | <b>2.3E-01</b> | <b>8.2E-01</b> |

## E

| Parameters             | Coef. estimate | Coef. standard error | Coef. t value | Coef. P-value (> t ) |
|------------------------|----------------|----------------------|---------------|----------------------|
| LA75                   | -1.4E-03       | 1.6E-02              | -8.5E-02      | 9.3E-01              |
| L75                    | 1.7E-03        | 2.1E-02              | 7.7E-02       | 9.4E-01              |
| LG75                   | -1.4E-03       | 2.2E-02              | -6.3E-02      | 9.5E-01              |
| NA75                   | -1.1E-08       | 1.9E-07              | -6.1E-02      | 9.5E-01              |
| C5000                  | 7.5E-04        | 1.2E-02              | 6.1E-02       | 9.5E-01              |
| TL5000                 | -1.4E-07       | 2.3E-06              | -6.0E-02      | 9.5E-01              |
| REFERENCE: ATCC19115   | 1.2E-02        | 2.1E-01              | 5.8E-02       | 9.5E-01              |
| NGA75                  | 1.0E-08        | 1.8E-07              | 5.8E-02       | 9.5E-01              |
| LGA75                  | 9.1E-04        | 1.6E-02              | 5.7E-02       | 9.5E-01              |
| NG75                   | -2.6E-08       | 5.3E-07              | -5.0E-02      | 9.6E-01              |
| N75                    | 2.6E-08        | 5.3E-07              | 4.9E-02       | 9.6E-01              |
| REFERENCE: ATCCBAA679  | 1.3E-02        | 2.6E-01              | 4.9E-02       | 9.6E-01              |
| C1000                  | -1.7E-04       | 3.5E-03              | -4.7E-02      | 9.6E-01              |
| TL10000                | 8.7E-08        | 1.9E-06              | 4.6E-02       | 9.6E-01              |
| MA                     | -4.4E-04       | 1.0E-02              | -4.2E-02      | 9.7E-01              |
| LMA                    | -8.1E-05       | 2.0E-03              | -4.1E-02      | 9.7E-01              |
| C10000                 | -5.9E-04       | 1.5E-02              | -4.1E-02      | 9.7E-01              |
| NG50                   | 1.8E-08        | 5.0E-07              | 3.6E-02       | 9.7E-01              |
| NGA50                  | -1.7E-08       | 5.1E-07              | -3.3E-02      | 9.7E-01              |
| LG50                   | 1.8E-03        | 5.9E-02              | 3.1E-02       | 9.8E-01              |
| UAC                    | -3.2E-05       | 1.1E-03              | -2.8E-02      | 9.8E-01              |
| SEQUENCING: NextSeq_B  | -8.2E-05       | 2.9E-03              | -2.8E-02      | 9.8E-01              |
| L50                    | -1.5E-03       | 5.5E-02              | -2.7E-02      | 9.8E-01              |
| PLATING: fifth_culture | 1.2E-04        | 4.4E-03              | 2.7E-02       | 9.8E-01              |
| PLATING: tenth_culture | 1.1E-04        | 4.6E-03              | 2.4E-02       | 9.8E-01              |
| MACL                   | 1.0E-09        | 4.5E-08              | 2.3E-02       | 9.8E-01              |
| BREADTH                | 7.9E-04        | 3.5E-02              | 2.3E-02       | 9.8E-01              |
| LA50                   | 1.3E-03        | 5.6E-02              | 2.3E-02       | 9.8E-01              |
| LA                     | 6.0E-09        | 2.7E-07              | 2.2E-02       | 9.8E-01              |
| LGA50                  | -1.3E-03       | 6.1E-02              | -2.2E-02      | 9.8E-01              |
| N50                    | -8.6E-09       | 4.2E-07              | -2.1E-02      | 9.8E-01              |
| ID100                  | -3.3E-04       | 1.6E-02              | -2.0E-02      | 9.8E-01              |
| LC                     | -5.1E-09       | 2.7E-07              | -1.9E-02      | 9.8E-01              |
| TL0                    | 1.8E-07        | 1.1E-05              | 1.7E-02       | 9.9E-01              |
| NA50                   | 7.1E-09        | 4.4E-07              | 1.6E-02       | 9.9E-01              |
| UACP                   | -2.4E-04       | 1.6E-02              | -1.5E-02      | 9.9E-01              |
| DR                     | -5.2E-02       | 4.2E+00              | -1.2E-02      | 9.9E-01              |
| TL25000                | 8.2E-09        | 7.0E-07              | 1.2E-02       | 9.9E-01              |
| TAL                    | 1.1E-07        | 9.6E-06              | 1.1E-02       | 9.9E-01              |
| UAL                    | -1.1E-07       | 1.0E-05              | -1.1E-02      | 9.9E-01              |
| TL1000                 | 3.4E-08        | 3.4E-06              | 1.0E-02       | 9.9E-01              |
| N100                   | -1.6E-03       | 1.8E-01              | -9.1E-03      | 9.9E-01              |
| DNA: extraction_A      | -2.9E-05       | 3.5E-03              | -8.4E-03      | 9.9E-01              |
| DEPTH                  | 5.6E-07        | 8.6E-05              | 6.5E-03       | 9.9E-01              |
| TL50000                | -1.8E-09       | 2.8E-07              | -6.4E-03      | 9.9E-01              |

|                        |                |                |                |                |
|------------------------|----------------|----------------|----------------|----------------|
| GF                     | -1.3E-03       | 2.2E-01        | -6.0E-03       | 1.0E+00        |
| C50000                 | -6.8E-05       | 1.1E-02        | -6.0E-03       | 1.0E+00        |
| MM100                  | 1.7E-05        | 3.4E-03        | 5.1E-03        | 1.0E+00        |
| C25000                 | -7.7E-05       | 1.7E-02        | -4.6E-03       | 1.0E+00        |
| GC                     | 1.4E-03        | 3.2E-01        | 4.3E-03        | 1.0E+00        |
| DNA: extraction_B      | -6.5E-06       | 3.3E-03        | -2.0E-03       | 1.0E+00        |
| C0                     | 1.1E-06        | 7.0E-04        | 1.6E-03        | 1.0E+00        |
| <b>Model intercept</b> | <b>6.7E+00</b> | <b>1.6E+01</b> | <b>4.1E-01</b> | <b>6.8E-01</b> |

## F

| Parameters            | Coef. estimate | Coef. standard error | Coef. t value | Coef. P-value (> t ) |
|-----------------------|----------------|----------------------|---------------|----------------------|
| N100                  | -3.4E-04       | 3.4E-05              | -1.0E+01      | 2.0E-16              |
| LC                    | -2.6E-07       | 2.7E-07              | -9.8E-01      | 3.3E-01              |
| LA                    | 2.7E-07        | 2.7E-07              | 9.8E-01       | 3.3E-01              |
| NG50                  | -2.1E-07       | 2.3E-07              | -9.3E-01      | 3.5E-01              |
| MACL                  | 3.1E-08        | 3.8E-08              | 8.1E-01       | 4.2E-01              |
| L50                   | 2.3E-02        | 3.0E-02              | 7.8E-01       | 4.4E-01              |
| N50                   | 1.3E-07        | 1.7E-07              | 7.5E-01       | 4.5E-01              |
| LG50                  | -2.1E-02       | 3.0E-02              | -7.1E-01      | 4.8E-01              |
| SQEM                  | 1.5E-02        | 3.5E-02              | 4.4E-01       | 6.6E-01              |
| TL0                   | 4.6E-06        | 1.1E-05              | 4.4E-01       | 6.6E-01              |
| C1000                 | 2.6E-03        | 6.3E-03              | 4.0E-01       | 6.9E-01              |
| TL25000               | -4.3E-07       | 1.2E-06              | -3.7E-01      | 7.1E-01              |
| REFERENCE: ATCC19115  | 7.3E-02        | 2.0E-01              | 3.6E-01       | 7.2E-01              |
| BREADTH               | 1.2E-02        | 3.5E-02              | 3.5E-01       | 7.3E-01              |
| SQLM                  | 5.5E-04        | 1.6E-03              | 3.4E-01       | 7.3E-01              |
| REFERENCE: ATCCBAA679 | 8.1E-02        | 2.4E-01              | 3.3E-01       | 7.4E-01              |
| C10000                | -9.0E-03       | 2.8E-02              | -3.3E-01      | 7.4E-01              |
| LA50                  | -1.2E-02       | 3.9E-02              | -3.1E-01      | 7.6E-01              |
| SEQUENCING: NextSeq_B | -8.4E-04       | 2.9E-03              | -2.9E-01      | 7.8E-01              |
| LA75                  | 4.7E-03        | 1.8E-02              | 2.7E-01       | 7.9E-01              |
| L75                   | -8.7E-03       | 3.4E-02              | -2.6E-01      | 8.0E-01              |
| LGA75                 | -4.1E-03       | 1.7E-02              | -2.4E-01      | 8.1E-01              |
| UAL                   | -2.8E-06       | 1.2E-05              | -2.3E-01      | 8.2E-01              |
| C25000                | 5.9E-03        | 2.6E-02              | 2.3E-01       | 8.2E-01              |
| TAL                   | -1.7E-06       | 7.9E-06              | -2.2E-01      | 8.3E-01              |
| NGA50                 | 8.3E-08        | 3.9E-07              | 2.1E-01       | 8.3E-01              |
| TL10000               | 7.0E-07        | 3.4E-06              | 2.0E-01       | 8.4E-01              |
| UAC                   | 8.7E-04        | 4.4E-03              | 2.0E-01       | 8.4E-01              |
| NGA75                 | -4.4E-08       | 2.4E-07              | -1.8E-01      | 8.5E-01              |
| LGA50                 | 6.8E-03        | 4.0E-02              | 1.7E-01       | 8.6E-01              |
| C50000                | 3.4E-03        | 2.1E-02              | 1.6E-01       | 8.7E-01              |
| LG75                  | 5.4E-03        | 3.4E-02              | 1.6E-01       | 8.7E-01              |
| UAMC                  | -2.9E-03       | 1.9E-02              | -1.6E-01      | 8.8E-01              |
| DR                    | 1.3E+00        | 9.0E+00              | 1.5E-01       | 8.8E-01              |
| ID100                 | 2.4E-03        | 1.7E-02              | 1.5E-01       | 8.8E-01              |
| TL1000                | -1.3E-06       | 8.7E-06              | -1.4E-01      | 8.8E-01              |
| LMA                   | -2.3E-04       | 1.7E-03              | -1.4E-01      | 8.9E-01              |

|                        |                |                |                |                |
|------------------------|----------------|----------------|----------------|----------------|
| MA                     | -4.2E-03       | 3.7E-02        | -1.1E-01       | 9.1E-01        |
| PLATING: tenth_culture | 5.2E-04        | 4.7E-03        | 1.1E-01        | 9.1E-01        |
| TL50000                | -6.5E-08       | 5.9E-07        | -1.1E-01       | 9.1E-01        |
| DEPTH                  | -1.0E-05       | 9.3E-05        | -1.1E-01       | 9.1E-01        |
| GF                     | -2.2E-02       | 2.2E-01        | -9.9E-02       | 9.2E-01        |
| C0                     | -3.9E-04       | 4.1E-03        | -9.4E-02       | 9.3E-01        |
| PLATING: fifth_culture | 4.0E-04        | 4.5E-03        | 9.0E-02        | 9.3E-01        |
| NG75                   | 1.0E-07        | 1.3E-06        | 8.0E-02        | 9.4E-01        |
| MAC                    | 2.5E-03        | 3.9E-02        | 6.5E-02        | 9.5E-01        |
| N75                    | -6.4E-08       | 1.2E-06        | -5.2E-02       | 9.6E-01        |
| NA75                   | 1.3E-08        | 2.7E-07        | 4.7E-02        | 9.6E-01        |
| GC                     | 1.5E-02        | 3.7E-01        | 4.0E-02        | 9.7E-01        |
| MM100                  | -9.0E-05       | 2.7E-03        | -3.3E-02       | 9.7E-01        |
| NA50                   | 1.1E-08        | 3.4E-07        | 3.3E-02        | 9.7E-01        |
| DNA: extraction_B      | 5.5E-05        | 3.5E-03        | 1.6E-02        | 9.9E-01        |
| DNA: extraction_A      | 3.7E-05        | 3.4E-03        | 1.1E-02        | 9.9E-01        |
| C5000                  | -2.0E-04       | 2.1E-02        | -9.5E-03       | 9.9E-01        |
| UACP                   | -1.7E-04       | 2.1E-02        | -8.1E-03       | 9.9E-01        |
| TL5000                 | 1.6E-08        | 3.5E-06        | 4.6E-03        | 1.0E+00        |
| <b>Model intercept</b> | <b>9.9E-01</b> | <b>1.8E+01</b> | <b>5.6E-02</b> | <b>9.6E-01</b> |

---
