# Supplementary material for: In vitro and in silico parameters for precise cgMLST typing of Listeria monocytogenes
Source: PubMed Central journal article supplement (PMC8961897; doi:10.1186/s12864-022-08437-4), 2022-03-26
Supplement: 12864_2022_8437_MOESM6_ESM.pdf [file 12864_2022_8437_MOESM6_ESM.pdf]

**A**

Identified alleles against schema (restricted scale)

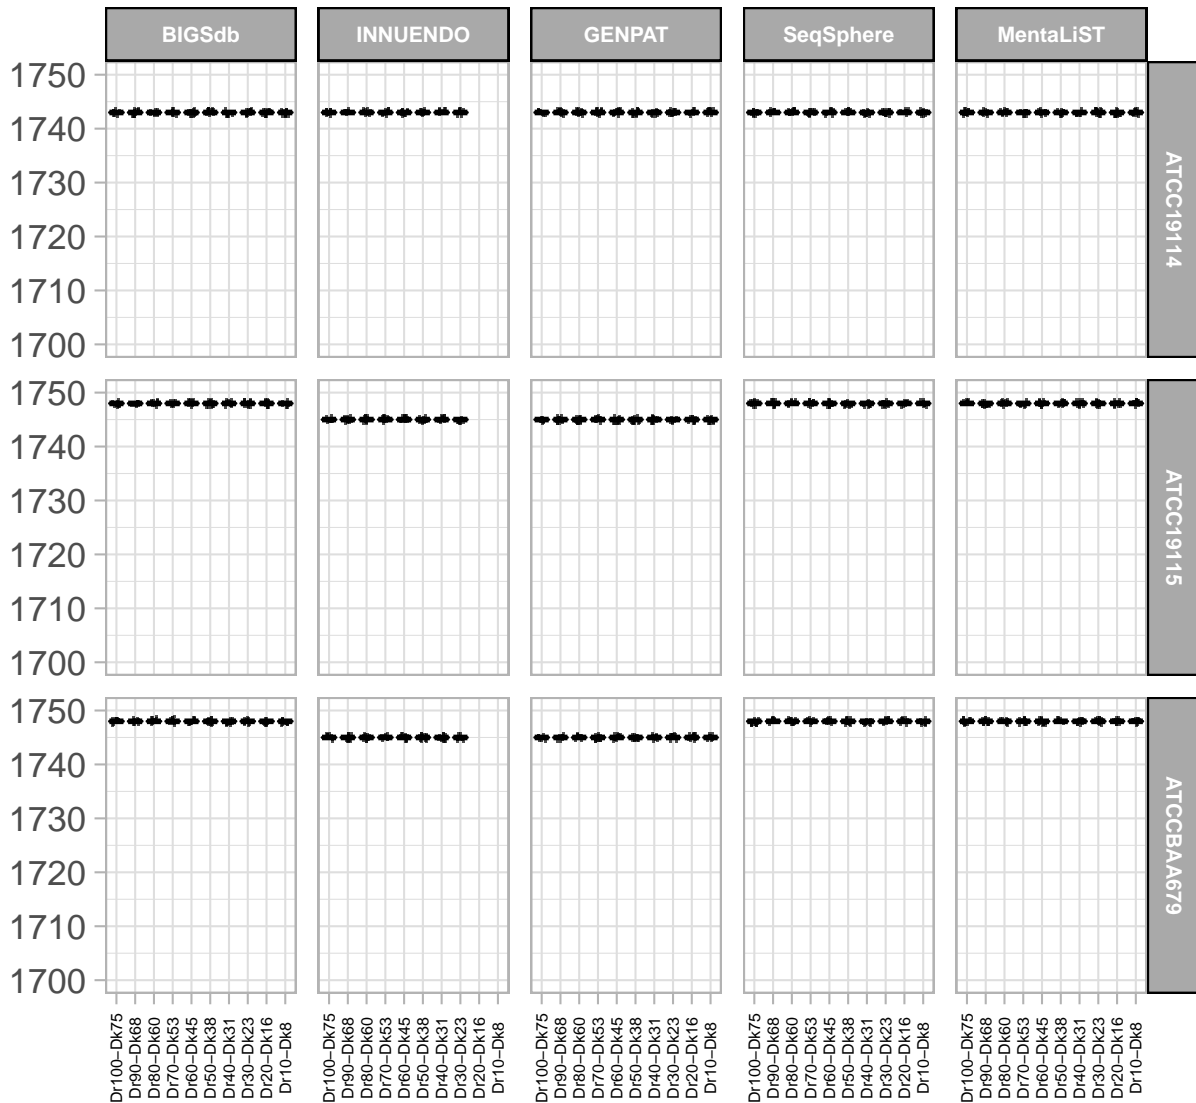

Targeted read (Dr) and kmer (Dk) depth (X)

**B**

Identified alleles against schema (restricted scale)

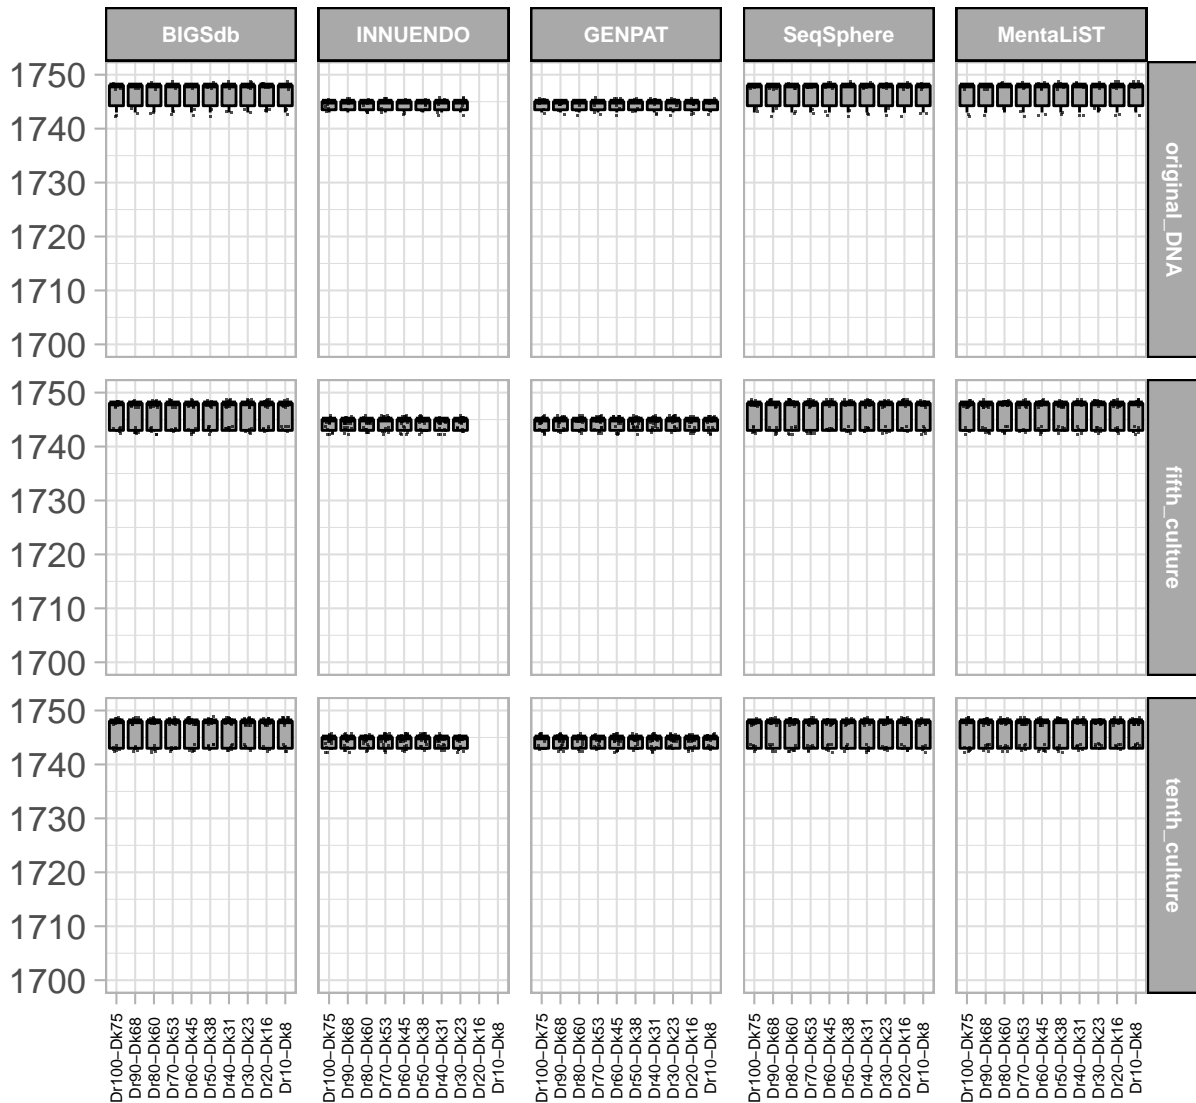

Targeted read (Dr) and kmer (Dk) depth (X)

**C**

Identified alleles against schema (restricted scale)

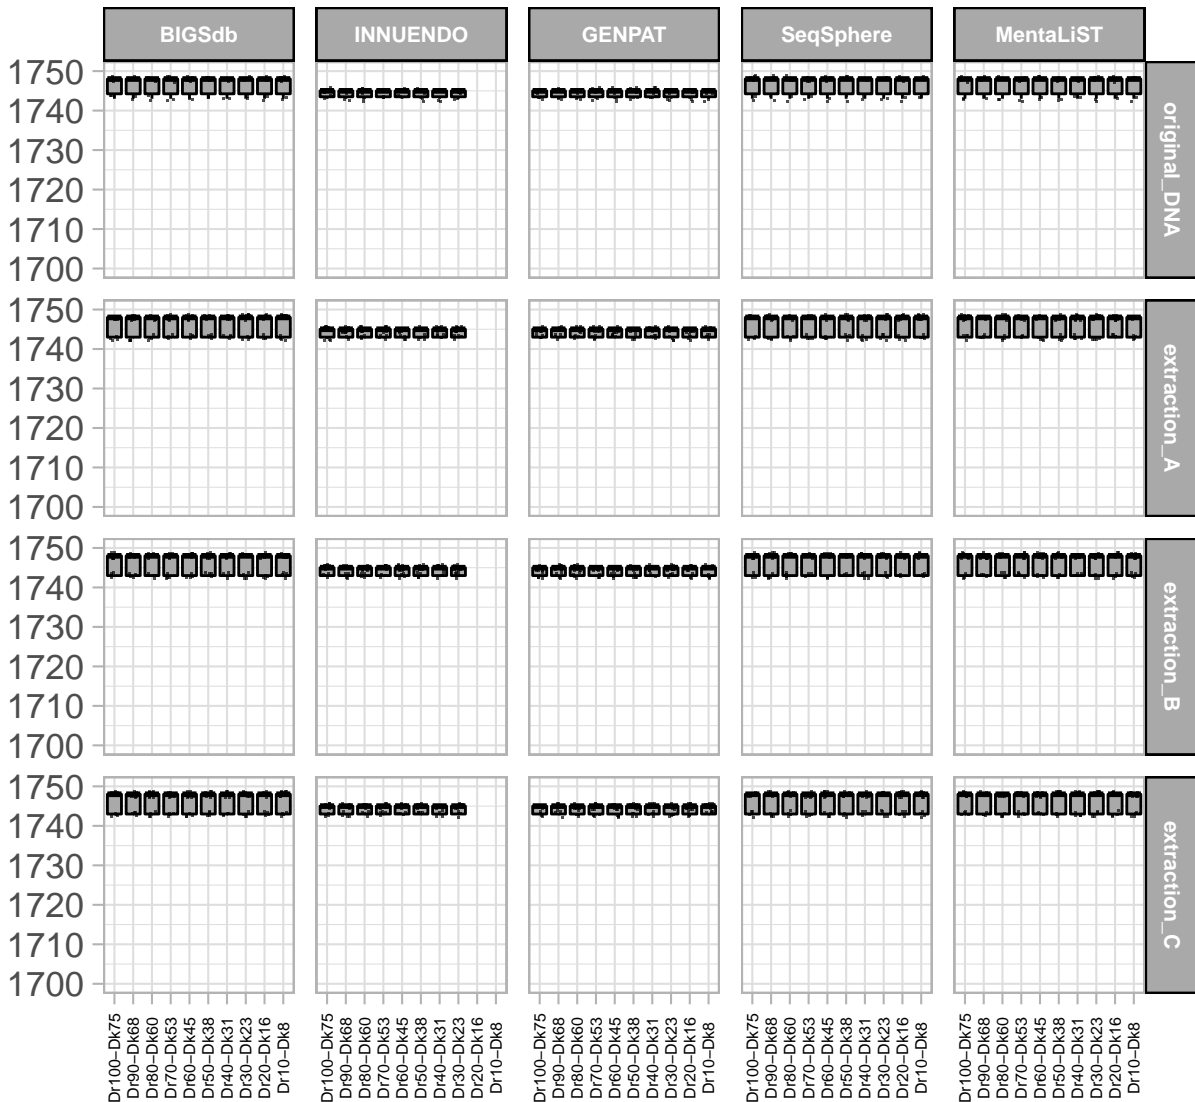

Targeted read (Dr) and kmer (Dk) depth (X)

**D**

Identified alleles against schema (restricted scale)

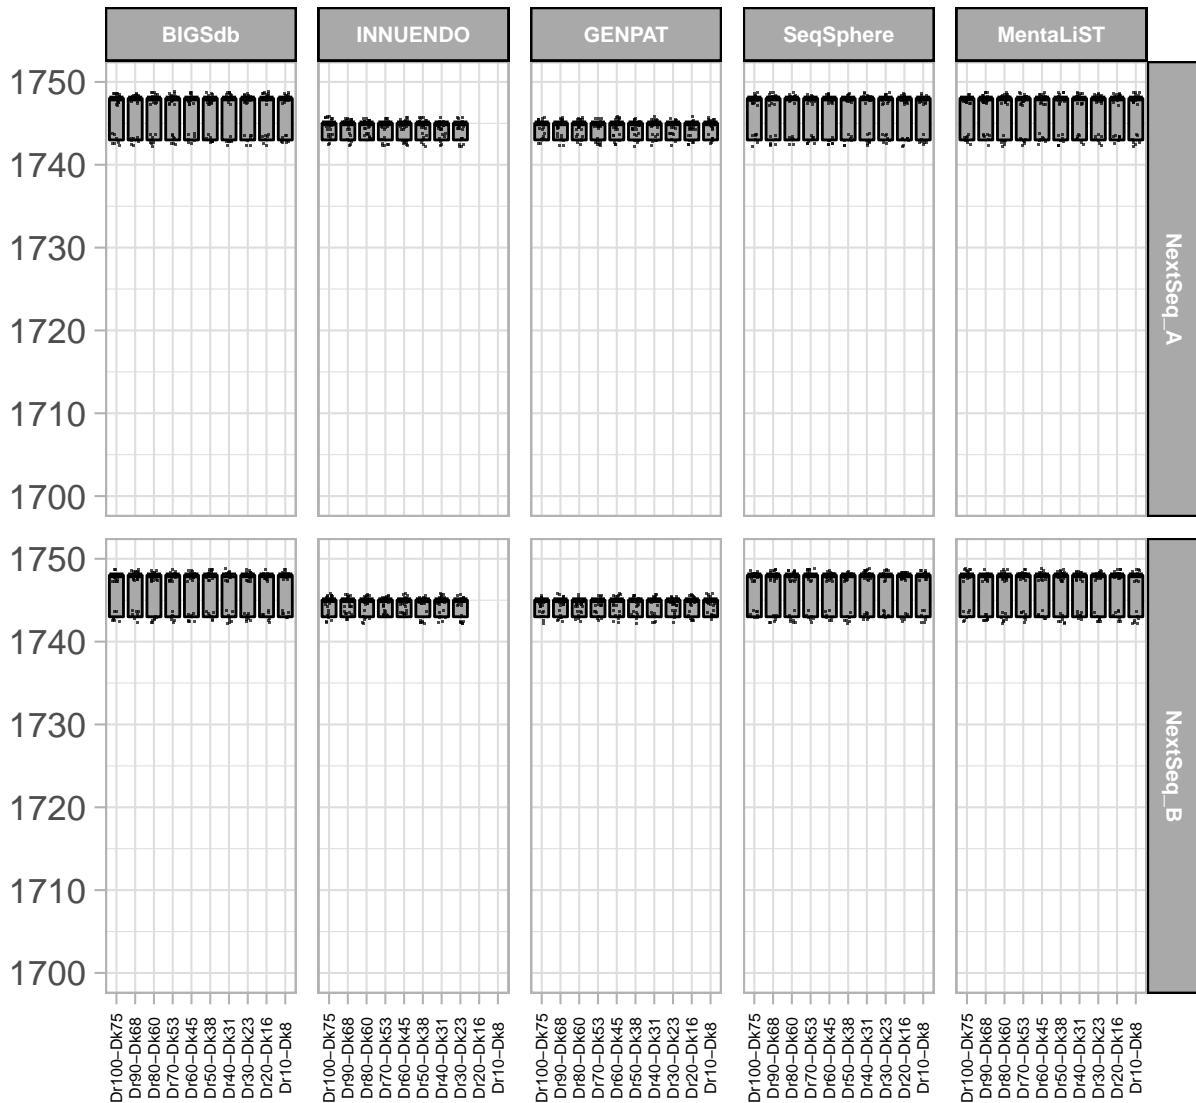

Targeted read (Dr) and kmer (Dk) depth (X)

**E**

Identical alleles against reference (extended scale)

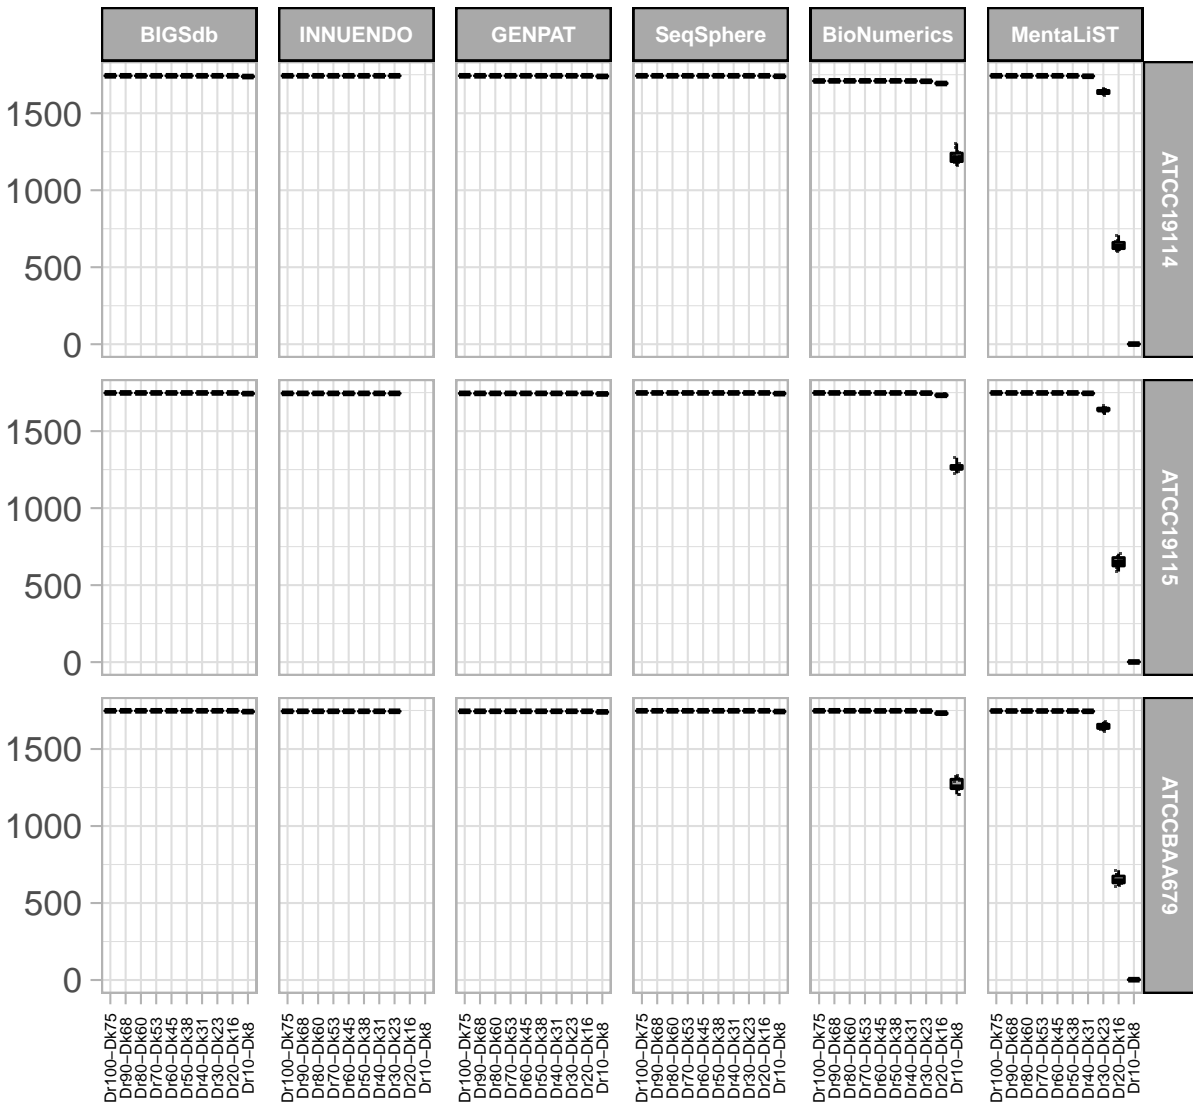

Targeted read (Dr) and kmer (Dk) depth (X)

**F**

Identical alleles against reference (extended scale)

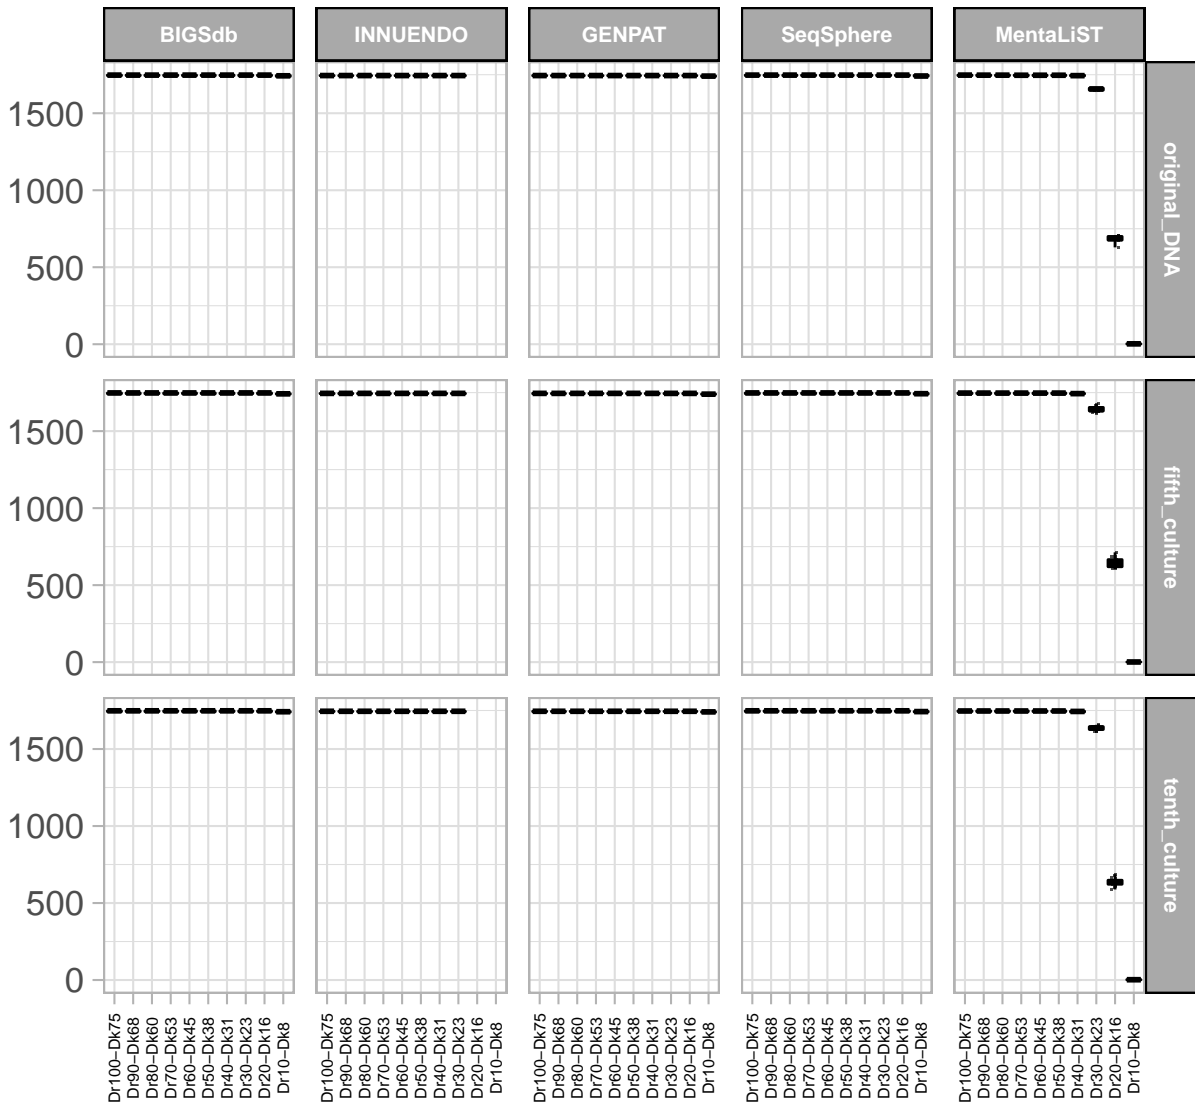

Targeted read (Dr) and kmer (Dk) depth (X)



# H

Identical alleles against reference (extended scale)

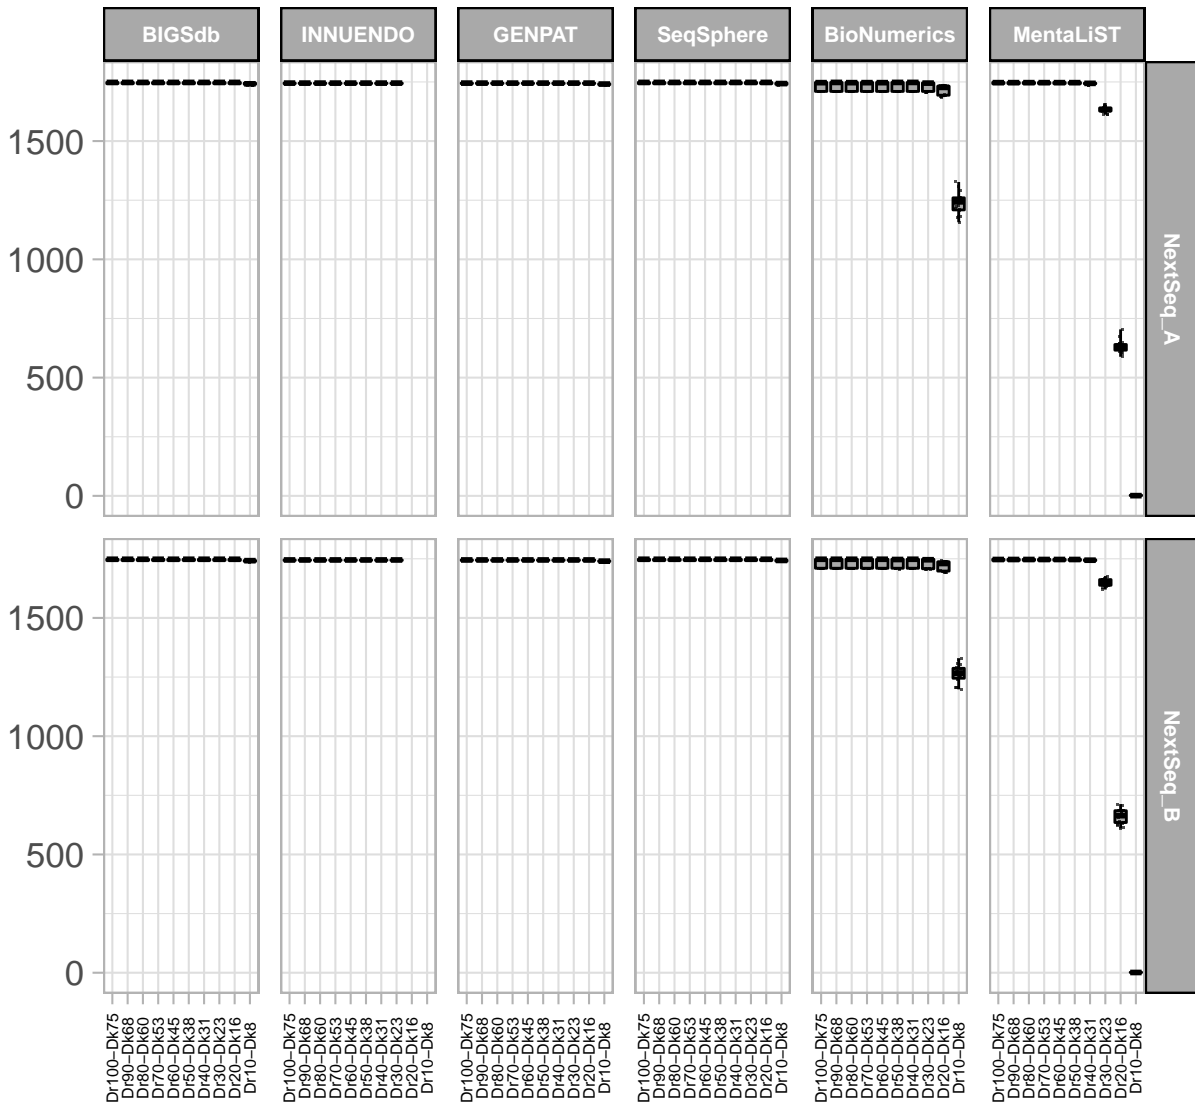

Targeted read (Dr) and kmer (Dk) depth (X)



Identical alleles against reference (restricted scale)

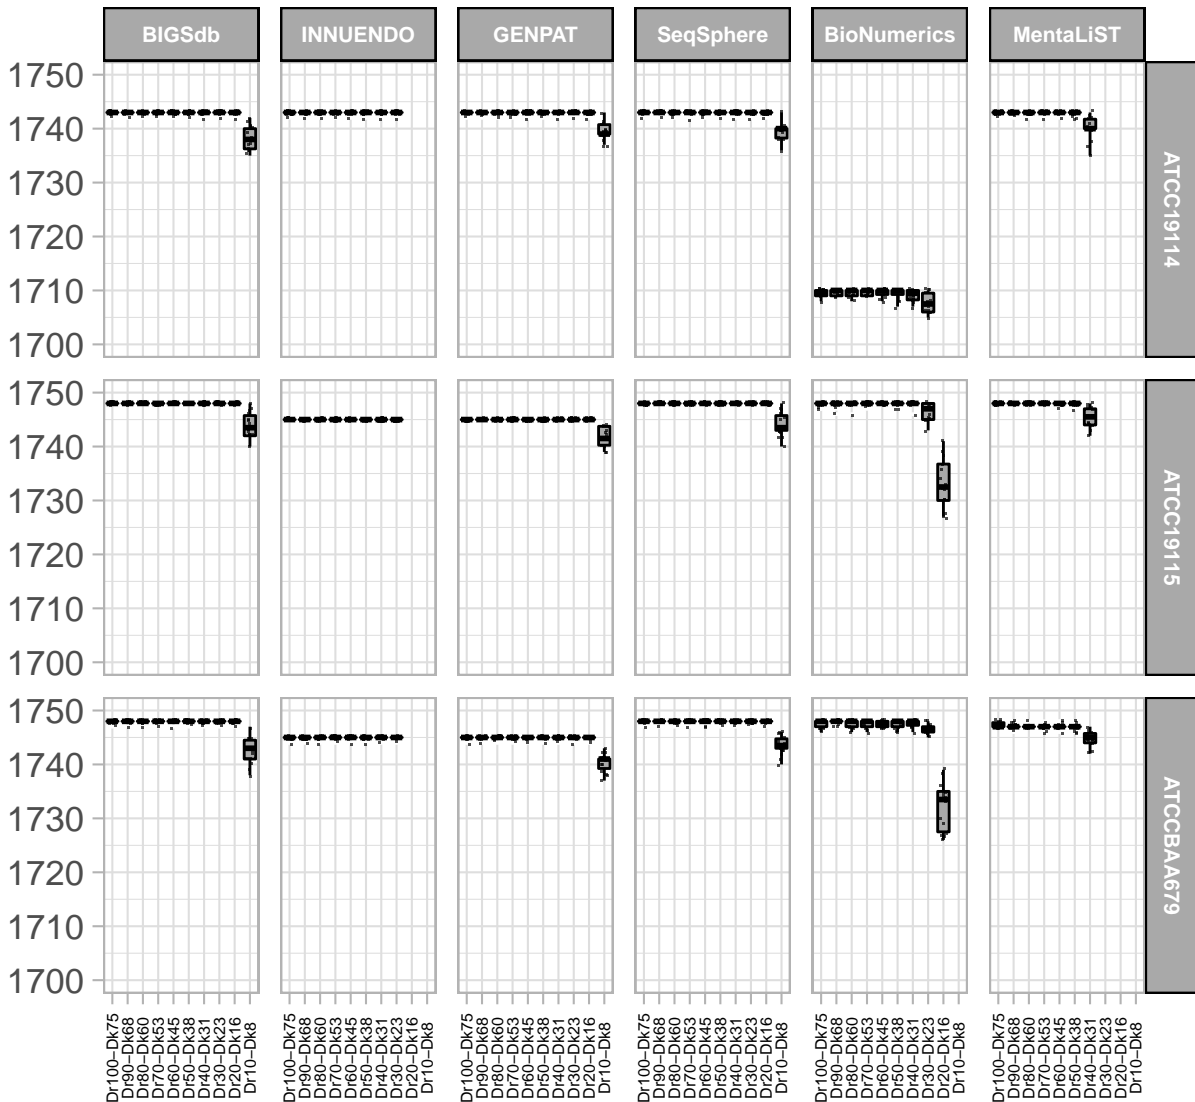

Targeted read (Dr) and kmer (Dk) depth (X)

**J****Identical alleles against reference (restricted scale)**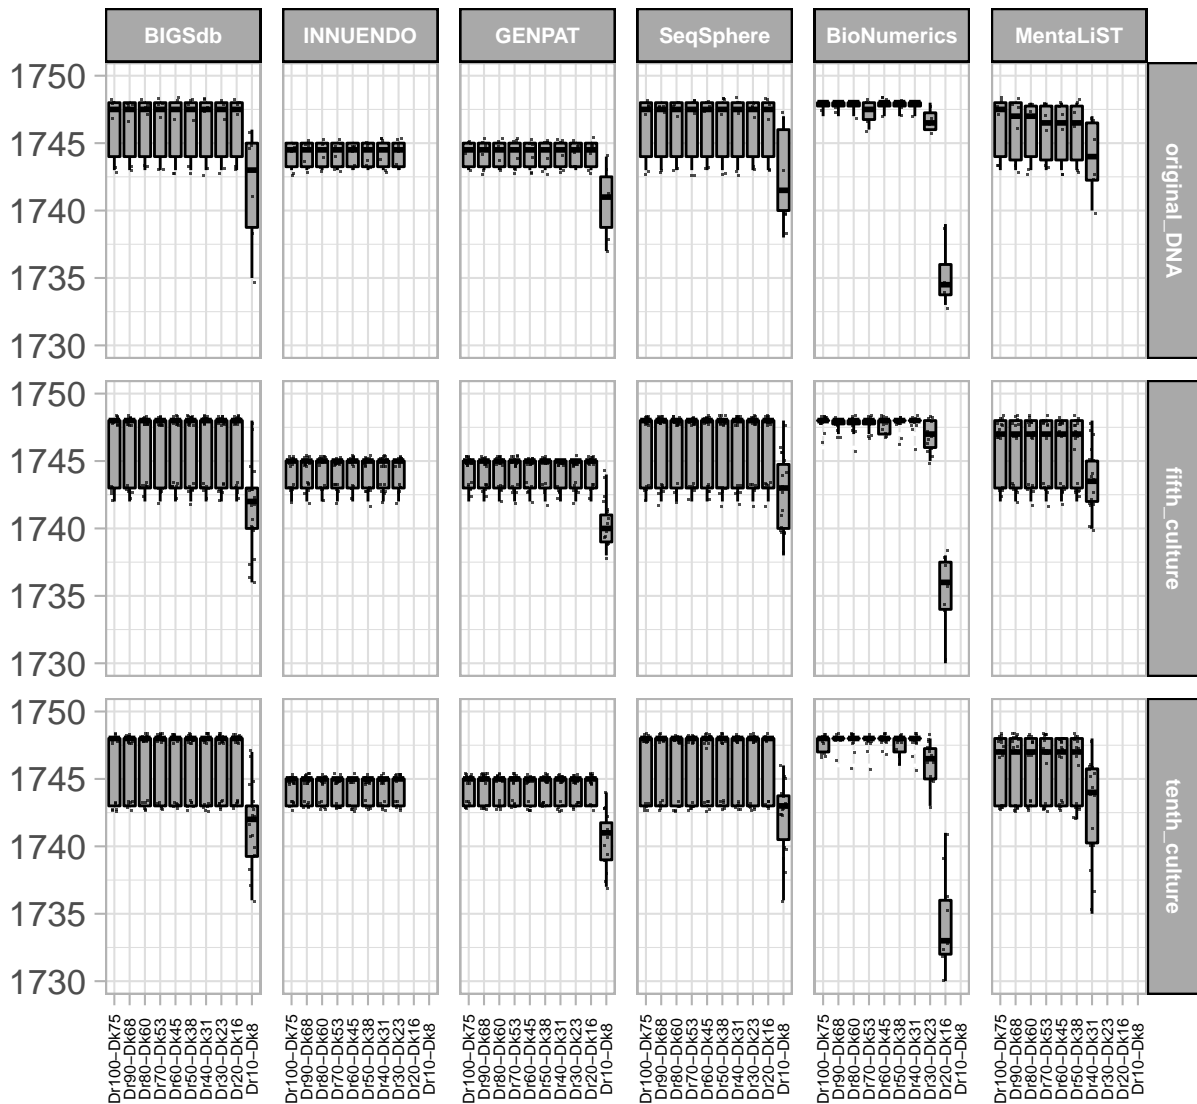**Targeted read (Dr) and kmer (Dk) depth (X)**

# K

Identical alleles against reference (restricted scale)

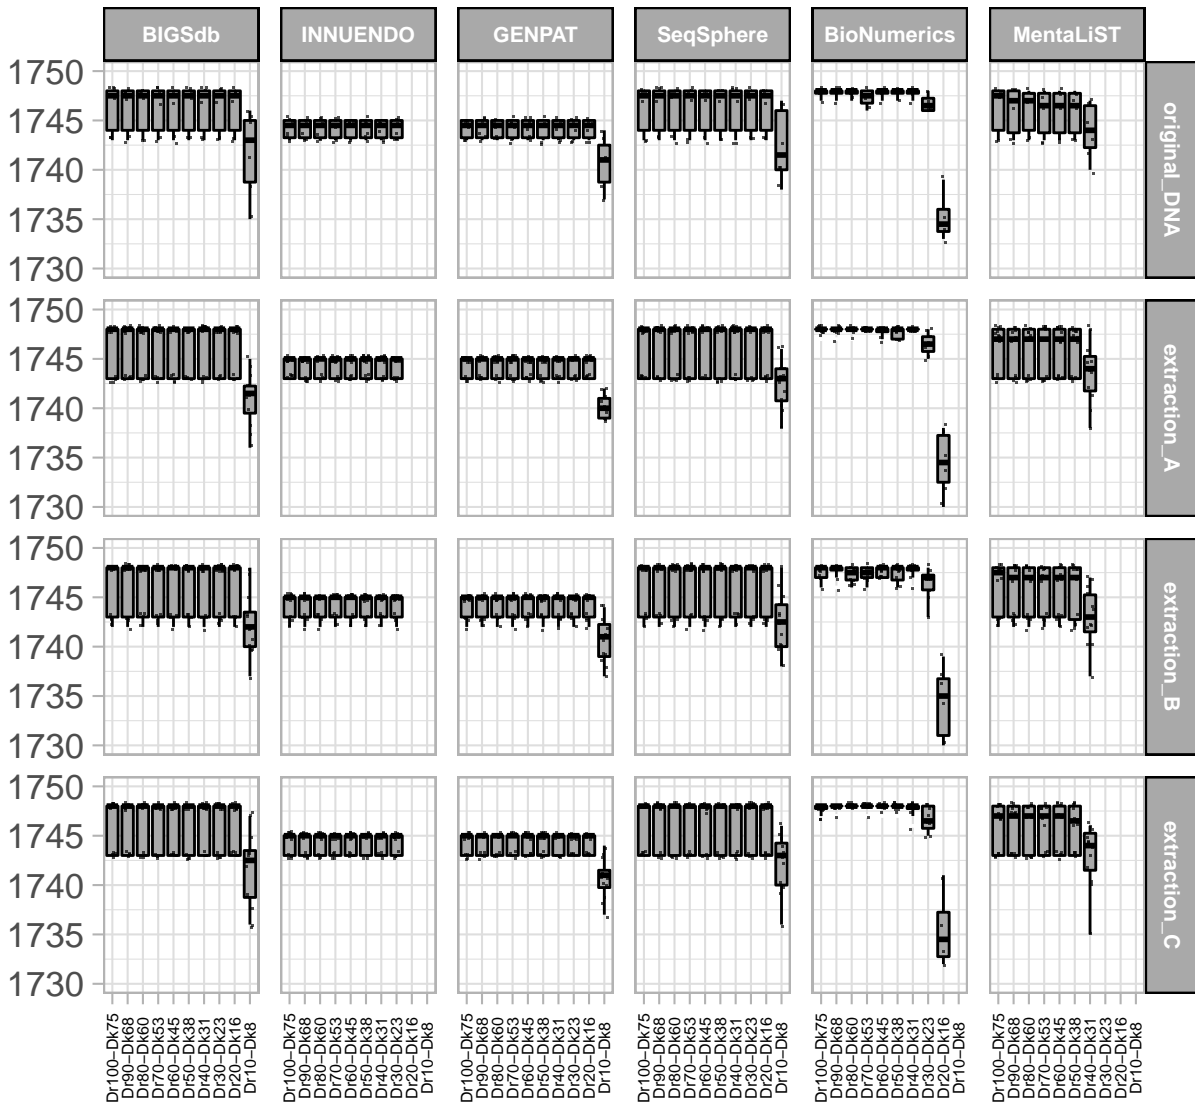

Targeted read (Dr) and kmer (Dk) depth (X)

L

Identical alleles against reference (restricted scale)

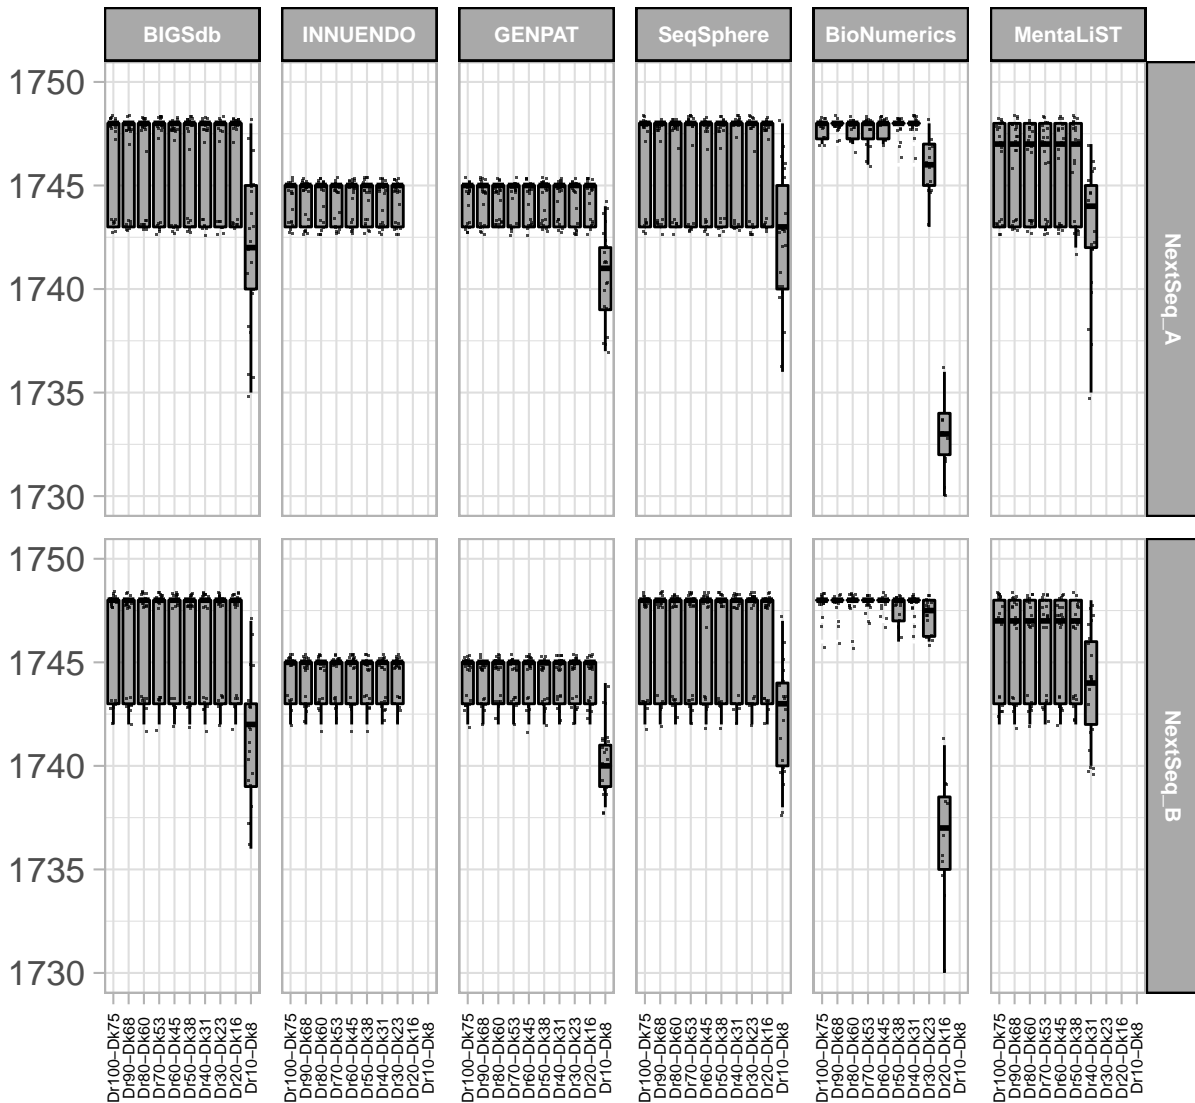

Targeted read (Dr) and kmer (Dk) depth (X)
