# Supplementary material for: In vitro and in silico parameters for precise cgMLST typing of Listeria monocytogenes
Source: PubMed Central journal article supplement (PMC8961897; doi:10.1186/s12864-022-08437-4), 2022-03-26
Supplement: 12864_2022_8437_MOESM8_ESM.pdf [file 12864_2022_8437_MOESM8_ESM.pdf]

**A**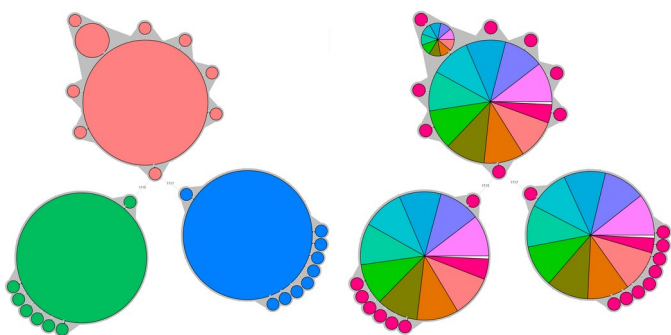**B**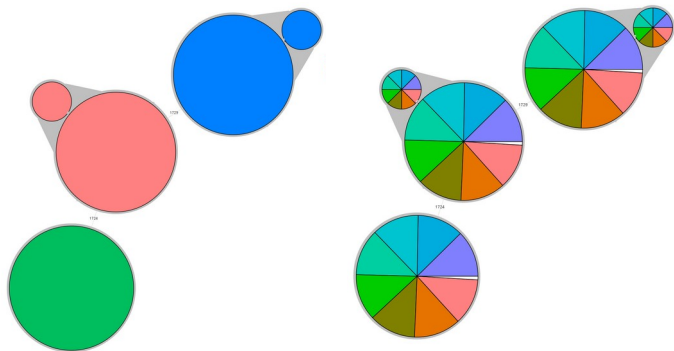**C**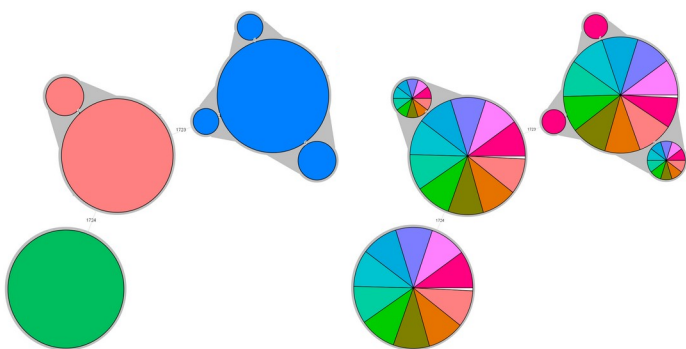**D**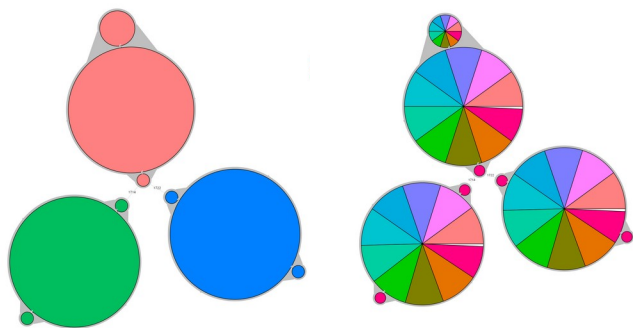**E**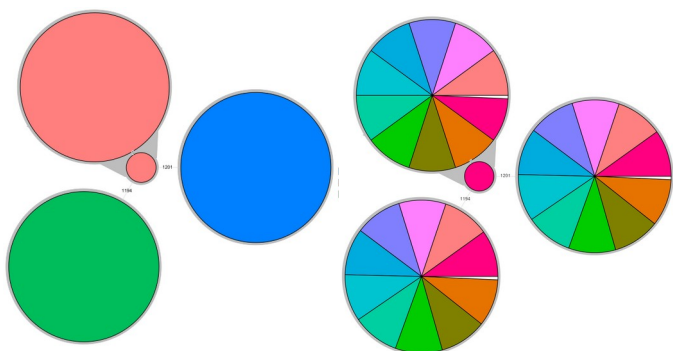**F**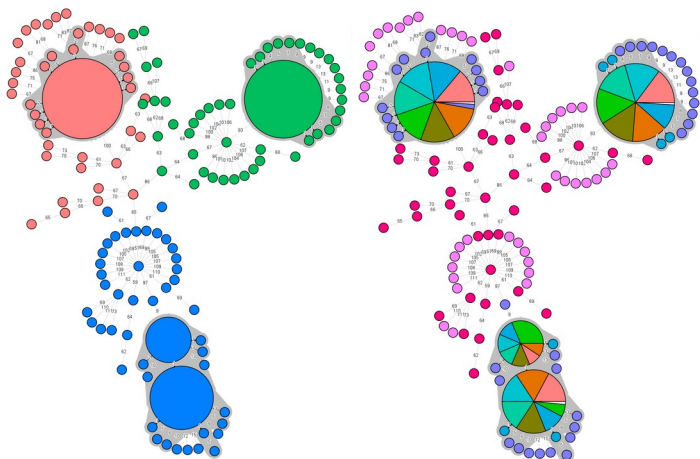**reference genomes**

- ATCC19114
- ATCC19115
- ATCCBAA679

**targeted depth**

- Dr100-Dk75
- Dr90-Dk68
- Dr80-Dk60
- Dr70-Dk53
- Dr60-Dk45
- Dr50-Dk38
- Dr40-Dk31
- Dr30-Dk23
- Dr20-Dk16
- Dr10-Dk8
