# Supplementary material for: In vitro and in silico parameters for precise cgMLST typing of Listeria monocytogenes
Source: PubMed Central journal article supplement (PMC8961897; doi:10.1186/s12864-022-08437-4), 2022-03-26

**A**

Identical alleles against reference (extended scale)

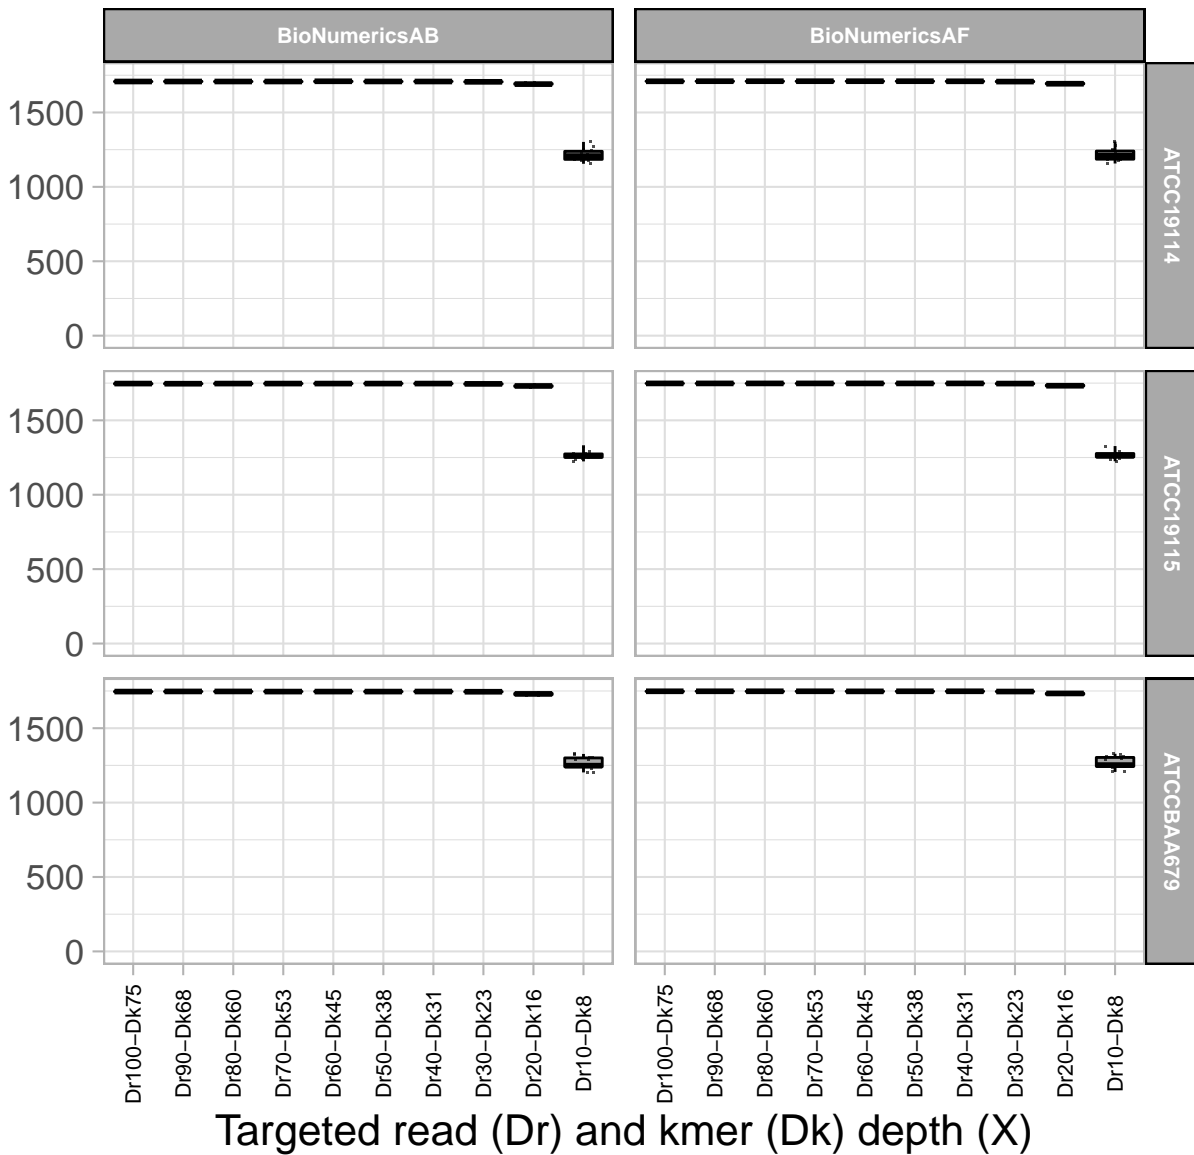

**B**

Identical alleles against reference (extended scale)

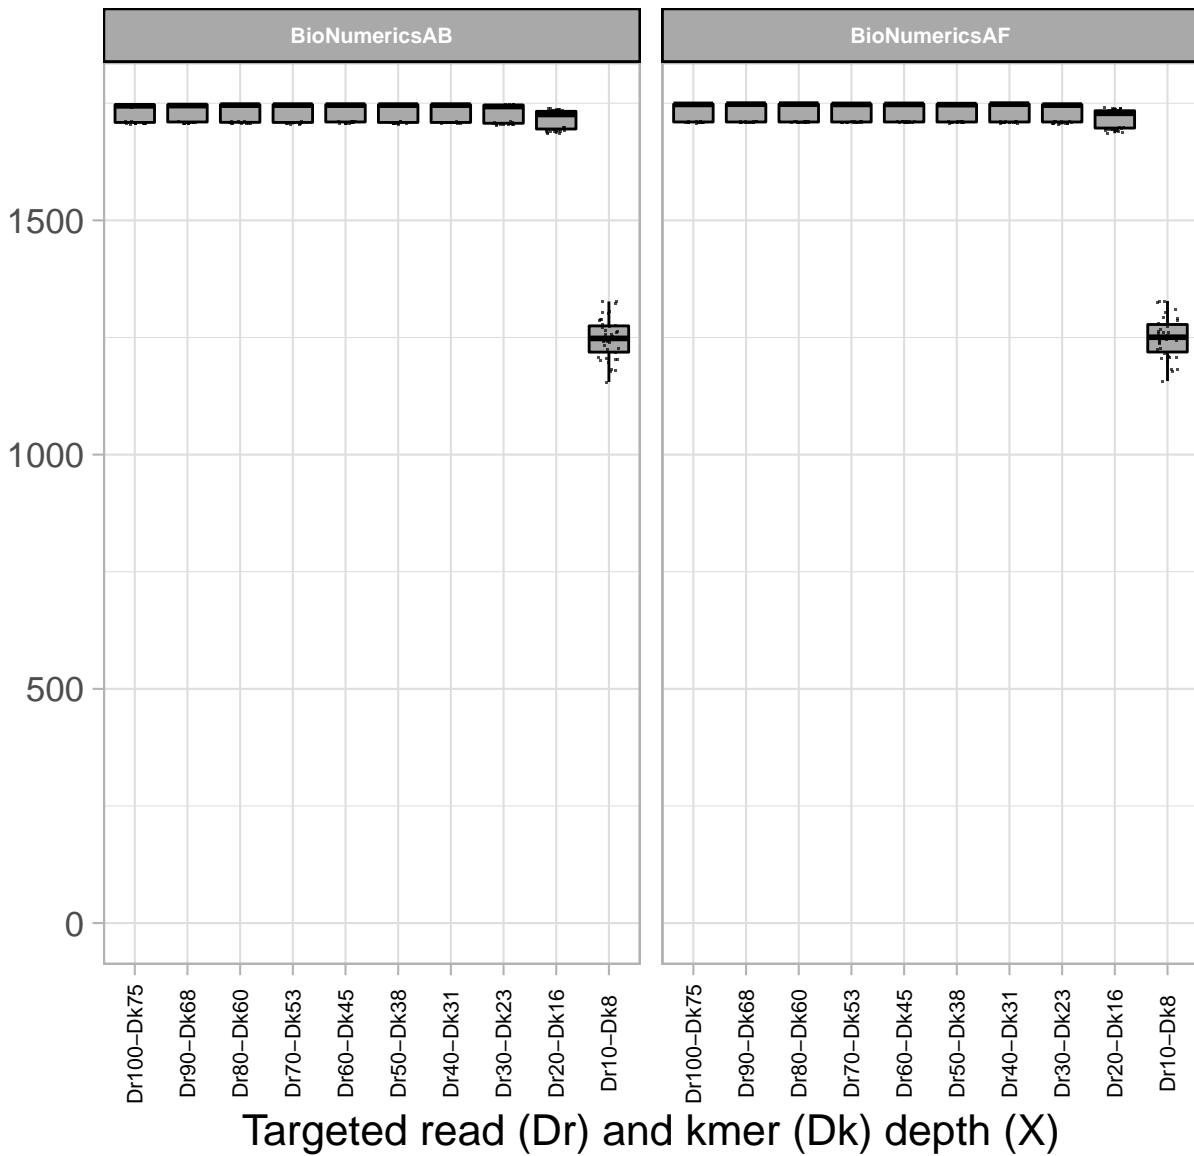

**C**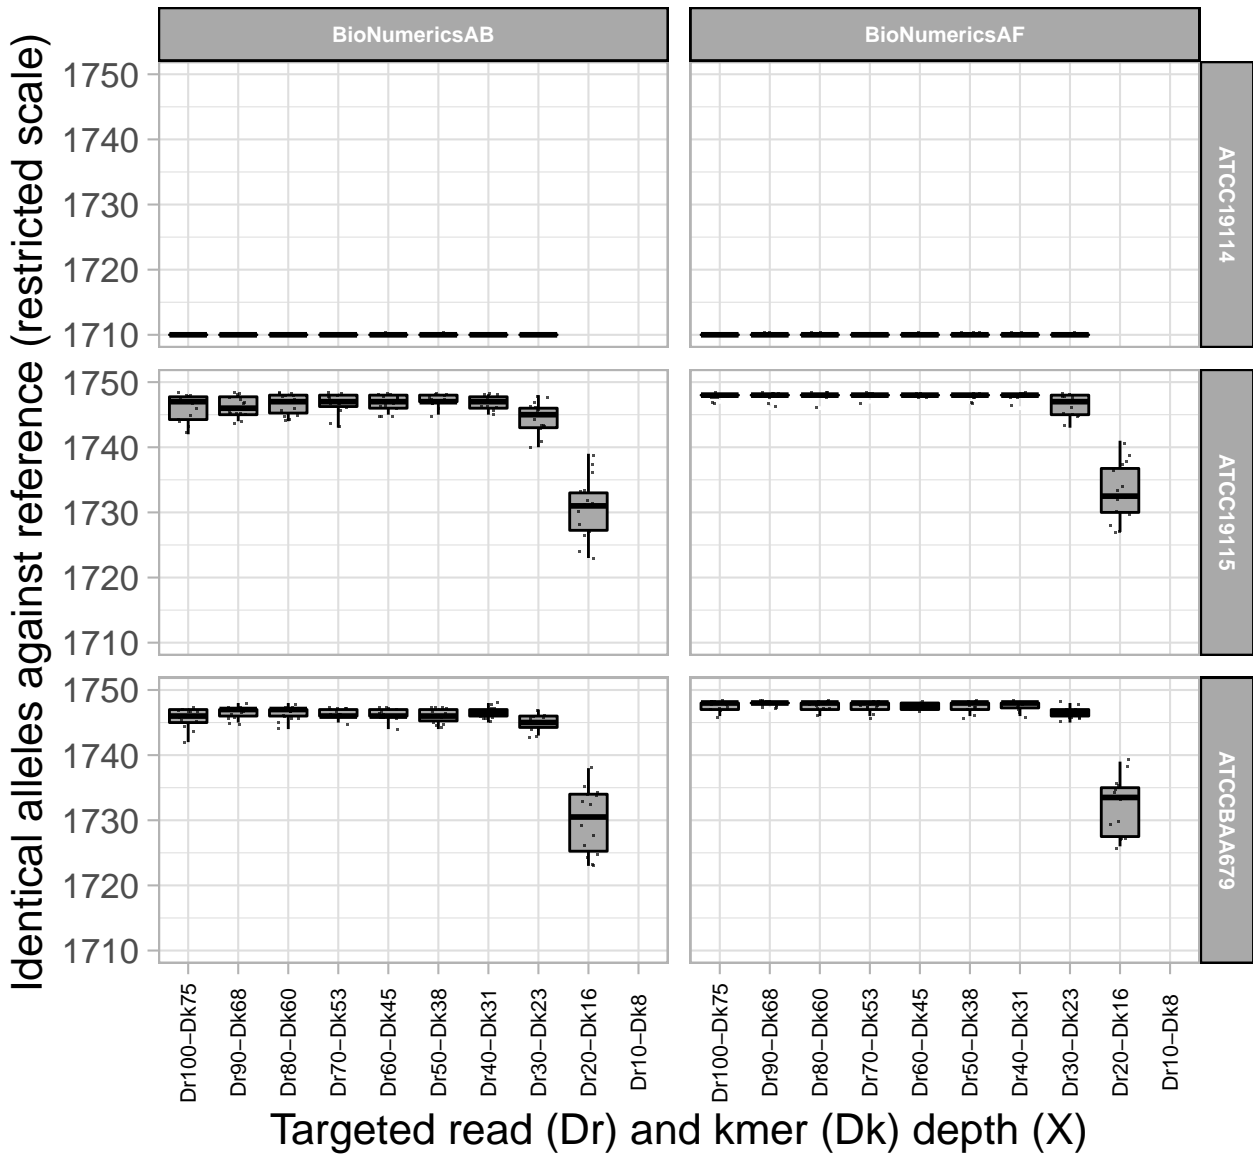

**D**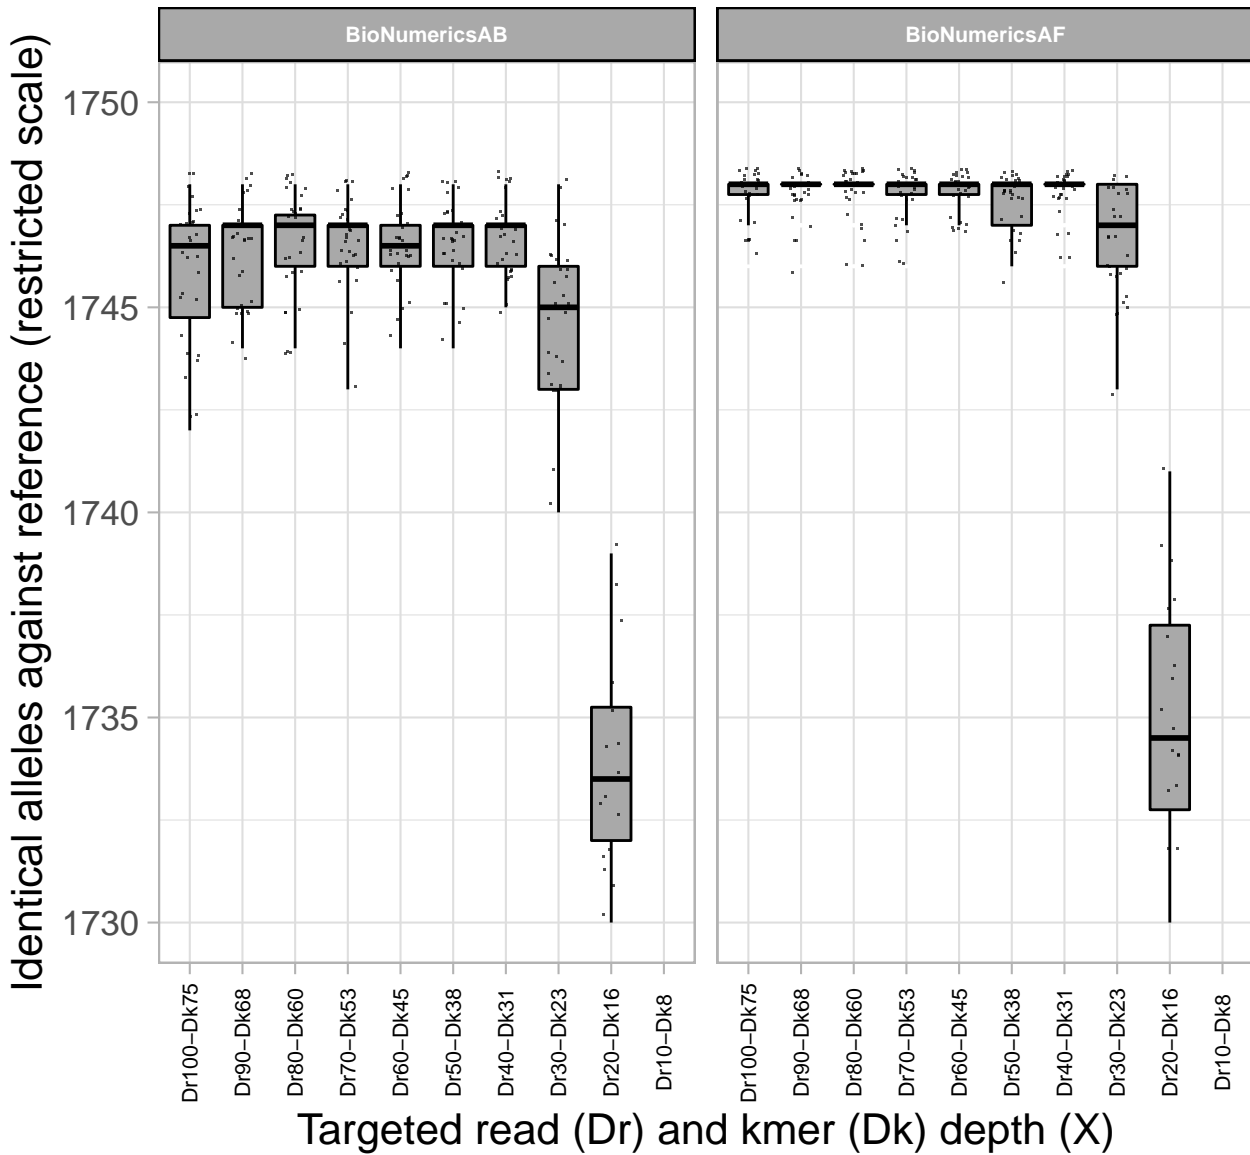

Supplement: 12864_2022_8437_MOESM9_ESM.pdf [file 12864_2022_8437_MOESM9_ESM.pdf]
